# Supplementary material for: Integrated transcriptome and methylome analysis in youth at high risk for bipolar disorder: a preliminary analysis
Source: PubMed Central journal article supplement (PMC5416675; doi:10.1038/tp.2017.32), 2017-03-14
Supplement: tp201732x1.pdf [file tp201732x1.pdf]

## Supplementary Material

### Methods

#### Real-time quantitative PCR

A few genes shown to be differentially expressed between groups were selected for validation by quantitative real-time PCR using TaqMan<sup>®</sup> predesigned probes and primers (Life Technologies; Carlsbad, CA, USA), as follows: *SNORA65* – Hs03297864\_s1; *PITPNM1* – Hs00907527\_m1; *PBX2* – Hs01901345; *CREG1* – Hs00355412\_m1. Real-time quantitative PCR was also performed to assess the levels of *MED1*, *GTF2A1*, *HSPA1L*, and *TAF15* in the lymphoblastoid cells using the following TaqMan<sup>®</sup> probes (Life Technologies): *MED1* – Hs01062348\_m1; *GTF2A1* – HS01026831\_m1; *HSPA1L* – Hs00271466\_s1; *TAF15* – Hs00185844\_m1; [FKBP5 – Hs01561006\\_m1](#); [TSC22D3 – Hs00608272\\_m1](#); [PER1 – Hs01092603\\_m1](#). Beta-2 microglobulin (*B2M*, Hs00187842) was used as the endogenous control after an initial screening performed with four other genes (*ACTB*, *HPRT1*, *PGK1* and *GAPDH*) and analyzed with NormFinder<sup>1</sup>. Briefly, 600 ng of total RNA were reverse-transcribed to complementary DNA (cDNA) with the High Capacity cDNA Reverse Transcription Kit (Life Technologies) and used as templates in PCR reactions performed with the TaqMan<sup>®</sup> Gene Expression Master Mix (Life Technologies), according to manufacturer's instructions. Reactions were run in triplicate on a QuantStudio<sup>®</sup> 7 Flex Real-Time PCR System (Life Technologies) and analyzed by the delta delta Ct method<sup>2</sup>.

#### Methylome profiling

Genome-wide methylation data from the Infinium HumanMethylation 450 BeadChip array (Illumina) were processed using the GenomeStudio V2011.1 software, where quality control checks, normalization (controls), and background adjustment were performed. The control group was used as the reference for the differential methylation analysis, in which Illumina custom was employed as the error model and false discovery rate was computed. Probes with a detection *p*-value > 0.01, as well as those located on the X or

Y chromosomes or those containing single nucleotide polymorphisms, were removed from the analysis, resulting in 385 248 probes.

### **Database and literature mining**

Database and literature mining was performed to check for evidence of associations between the risk genes identified in our analysis and previous studies in BD patients. Specifically: 1) we checked whether the risk genes are located in *loci* previously linked to BD in linkage studies; 2) we looked for previously reported associations of the risk genes with BD in genome-wide association studies (GWAS) by mining the database for Genotypes and Phenotypes (dbGaP; [ncbi.nlm.nih.gov/gap/](http://ncbi.nlm.nih.gov/gap/))<sup>3</sup>; and 3) we looked for differences in the expression of those genes in genome-wide expression studies (GWES) comparing BD patients and controls using the Gene Expression Omnibus (GEO) database ([ncbi.nlm.nih.gov/geo/](http://ncbi.nlm.nih.gov/geo/)), followed by analysis on the GEO2R ([ncbi.nlm.nih.gov/geo/geo2r/](http://ncbi.nlm.nih.gov/geo/geo2r/)).

## Results

### Database and literature mining

#### *Linkage studies*

The region encompassing ‘risk gene’ *SLC45A4*, 8q24, is among the susceptibility *loci* reported for BD with a LOD score of 3.62 in a cohort of 75 BD families<sup>4</sup>. This association was later replicated in a sample of 3 757 individuals of Latino ancestry<sup>5</sup>. Likewise, the region 19q13, which includes the risk genes *CLPTM1* (19q13.32), *CLASRP* (19q13.32), and *ZNF234* (19q13.31) identified in our analysis, has also been linked to BD susceptibility<sup>6, 7</sup> and is proposed to harbor several putative candidate risk genes for BD<sup>6</sup>. Finally, the region 7q21, which includes the risk gene *MAGI2*, was associated with bipolar spectrum disorder in a linkage analysis<sup>8</sup> and also showed significant evidence for linkage with BD in a meta-analysis<sup>9</sup>.

#### *GWAS*

The only risk gene previously associated with BD in a GWAS study is *SLC45A4*<sup>10</sup>, which was identified in the analysis of 7 481 BD patients and 9 250 healthy controls. Specifically, the association with BD was found at an intergenic single nucleotide polymorphism (SNP) (rs782729) located between the *SLC45A4* and *GPR2* genes (location – 8: 142 300 315;  $p = 9.00 \times 10^{-6}$ ).

#### *GWES*

Microarray expression profiles were extracted from the publicly available GEO NCBI database, and the search criteria included the Medical Subject Heading (MeSH) term for “bipolar disorder” and “*Homo sapiens*”. After analysis on the GEO2R tool, we compared our list of risk genes with the differentially expressed genes in each of the datasets found. The selected datasets were GSE46449, which compared expression in leukocytes from first-episode (n=3) and currently medicated BD patients (n = 26) with matched healthy controls (n=25)<sup>11</sup>, and GSE39653, which compared expression in PBMCs from 24 adult healthy controls and 8 adult patients with BD<sup>12</sup>. Among our list of risk genes, differences in the

expression of *NUCKS1*, *ZNF641*, *PRR14*, *SAFB2*, *CLPTM1*, *FBXW11*, *ALDH6A1*, *CLASRP*, *TAF15*, *ARID4B*, *SUZ12*, *SLC45A4*, *DNAJC7*, *NLK*, *HUWE1*, *MTF2*, *ZNF234*, and *THOC2* have been reported in peripheral blood cells between BD patients and controls<sup>11, 12</sup>.

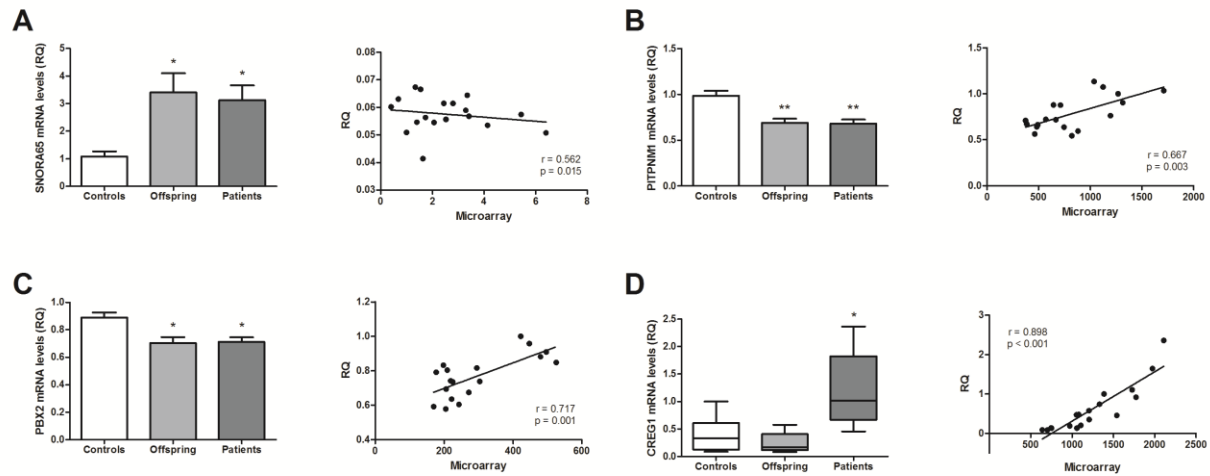

**Figure S1.** Validation of gene expression microarray results with real-time quantitative PCR. Results from selected risk genes were validated by real-time quantitative PCR using TaqMan® probes and primers: A) *SNORA65*; B) *PIPTNM1*; C) *PBX2*; D) *CREG1*. Expression levels of the target genes were normalized to the expression of beta-2 microglobulin levels, and relative quantification (RQ) levels were determined by the delta delta Ct method<sup>2</sup>. \* $p < 0.05$ ; \*\* $p < 0.01$  (one-way ANOVA followed by Tukey post-hoc test for results from A-C, and Kruskal-Wallis followed by Mann-Whitney tests for results from D).

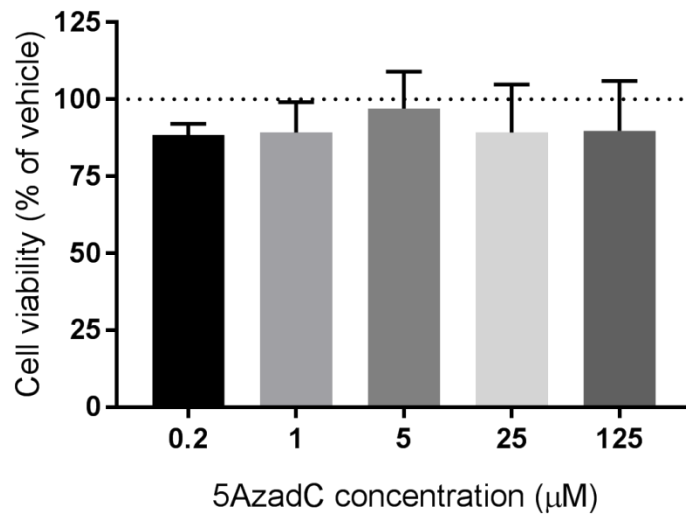

**Figure S2.** Cell viability after treatment of lymphoblastoid cells from controls ( $n = 6$ ) with different doses of 5-Aza-2'-deoxycytidine (5-AzadC) for 96 hours. One-way ANOVA  $F(5,30) = 1.154$ ,  $p = 0.354$ .

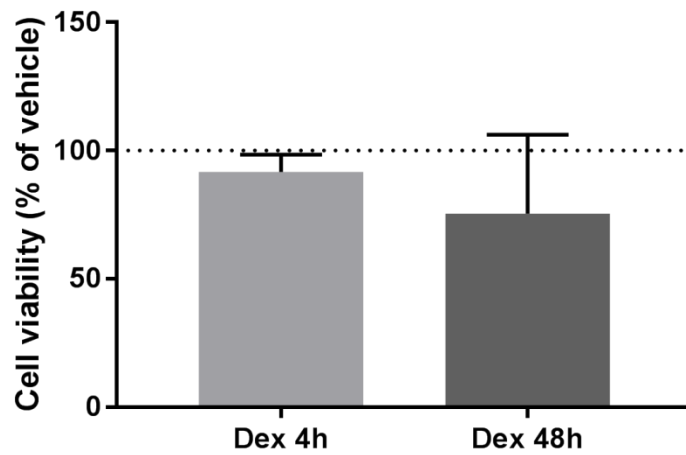

**Figure S3.** Cell viability after treatment of lymphoblastoid cells from controls ( $n = 6$ ) with  $10^{-7}$  M dexamethasone for 4 or 48 hours. None of these treatment conditions significantly reduced viability as assessed by MTT reduction. Comparisons between vehicle and dexamethasone were made with Mann-Whitney tests considering Bonferroni-corrected  $p$ -value  $< .025$  as significant: 4 h –  $p = 0.394$ ; 48 h –  $p = 0.066$ ).

**Table S1.** Differentially expressed genes between controls and unaffected offspring

| <b>Rank</b> | <b>Gene symbol</b>  | <b>Probe ID</b> | <b>Mean Controls</b> | <b>Mean Offspring</b> | <b>-log<sub>10</sub>(p-value)</b> |
|-------------|---------------------|-----------------|----------------------|-----------------------|-----------------------------------|
| 1           | <i>NUCKS1</i>       | 4880445         | 4877.38              | 2923.15               | 7.625                             |
| 2           | <i>PPARBP</i>       | 1070195         | 647.10               | 429.08                | 7.165                             |
| 3           | <i>XPR1</i>         | 160441          | 50.58                | 76.23                 | 7.007                             |
| 4           | <i>TAF15</i>        | 10176           | 3835.98              | 1351.73               | 6.939                             |
| 5           | <i>LSM14B</i>       | 2360754         | 22.15                | -1.02                 | 6.905                             |
| 6           | <i>ATP8B2</i>       | 6960168         | 977.42               | 427.35                | 6.764                             |
| 7           | <i>ATP6V1F</i>      | 3870630         | 2322.43              | 3241.37               | 6.602                             |
| 8           | <i>LOC644774</i>    | 6580544         | 852.35               | 1548.52               | 6.508                             |
| 9           | <i>HINT3</i>        | 2140279         | 661.07               | 2025.78               | 6.487                             |
| 10          | <i>IL11RA</i>       | 2760148         | 636.62               | 288.23                | 6.450                             |
| 11          | <i>LOC728649</i>    | 4610315         | 27.70                | 165.85                | 6.429                             |
| 12          | <i>GATAD2A</i>      | 1570373         | 2191.88              | 1542.20               | 6.356                             |
| 13          | <i>NIPSNAP3A</i>    | 2490100         | 178.78               | 346.08                | 6.334                             |
| 14          | <i>THOC2</i>        | 2490397         | 966.20               | 565.00                | 6.274                             |
| 15          | <i>MTF2</i>         | 2760255         | 790.62               | 560.70                | 6.201                             |
| 16          | <i>SFRS16</i>       | 2510722         | 195.30               | 71.40                 | 6.068                             |
| 17          | <i>PGK1</i>         | 6110400         | 3213.13              | 4315.75               | 6.023                             |
| 18          | <i>ARID4B</i>       | 2470603         | 586.08               | 272.12                | 6.007                             |
| 19          | <i>CMTM6</i>        | 1470520         | 1911.82              | 2946.80               | 5.976                             |
| 20          | <i>LOC100131360</i> | 1940025         | 164.93               | 81.88                 | 5.895                             |
| 21          | <i>EPC1</i>         | 6380008         | 266.33               | 105.97                | 5.885                             |
| 22          | <i>SAFB2</i>        | 2850091         | 1492.55              | 1058.78               | 5.791                             |
| 23          | <i>PBX2</i>         | 5820681         | 446.10               | 224.48                | 5.694                             |
| 24          | <i>FASTK</i>        | 770687          | 912.35               | 602.32                | 5.673                             |
| 25          | <i>HGS</i>          | 5130253         | 1545.93              | 1132.97               | 5.666                             |
| 26          | <i>TECPR1</i>       | 5810196         | 1139.43              | 591.27                | 5.620                             |
| 27          | <i>HIGD1A</i>       | 7100164         | 725.12               | 936.85                | 5.520                             |
| 28          | <i>DHX37</i>        | 4260142         | 688.78               | 489.52                | 5.403                             |
| 29          | <i>RPS6KA3</i>      | 2260133         | 381.35               | 192.22                | 5.320                             |
| 30          | <i>ZNF364</i>       | 7380382         | 1070.67              | 823.08                | 5.296                             |
| 31          | <i>UBE2E1</i>       | 4050070         | 93.70                | 50.07                 | 5.289                             |
| 32          | <i>ZNF641</i>       | 6650747         | 104.62               | 54.05                 | 5.258                             |
| 33          | <i>C10ORF26</i>     | 150678          | 142.58               | 207.30                | 5.248                             |
| 34          | <i>KIAA1530</i>     | 5910026         | 333.87               | 183.22                | 5.218                             |
| 35          | <i>SCAP</i>         | 3140382         | 1006.92              | 774.30                | 5.194                             |
| 36          | <i>FBXW11</i>       | 3460711         | 820.33               | 498.53                | 5.192                             |
| 37          | <i>HUWE1</i>        | 6980332         | 144.53               | 97.85                 | 5.181                             |
| 38          | <i>ARID4B</i>       | 6590722         | 383.28               | 219.60                | 5.166                             |
| 39          | <i>TOP3A</i>        | 3890553         | 311.82               | 200.15                | 5.165                             |
| 40          | <i>FBXW11</i>       | 510253          | 113.82               | 61.40                 | 5.148                             |



|    |                     |         |         |         |       |
|----|---------------------|---------|---------|---------|-------|
| 41 | <i>LENG8</i>        | 2000142 | 82.68   | 39.95   | 5.103 |
| 42 | <i>SPATA6</i>       | 3450193 | 20.63   | 53.63   | 5.052 |
| 43 | <i>DDX17</i>        | 7000259 | 399.13  | 188.72  | 5.040 |
| 44 | <i>SUZ12</i>        | 4920619 | 3164.18 | 2139.22 | 5.036 |
| 45 | <i>SAFB2</i>        | 7050670 | 1591.58 | 1101.40 | 5.001 |
| 46 | <i>IL7R</i>         | 3830349 | 3297.30 | 1441.23 | 4.994 |
| 47 | <i>DNAJC7</i>       | 3290037 | 552.73  | 351.83  | 4.969 |
| 48 | <i>HIPK2</i>        | 10332   | 553.87  | 324.13  | 4.946 |
| 49 | <i>FANCD2</i>       | 2690240 | 247.00  | 124.27  | 4.930 |
| 50 | <i>GMPR2</i>        | 2490600 | 825.77  | 1051.03 | 4.889 |
| 51 | <i>CIORF43</i>      | 4890113 | 186.48  | 312.55  | 4.886 |
| 52 | <i>SERPINB8</i>     | 3400672 | 139.58  | 265.42  | 4.879 |
| 53 | <i>ZNF275</i>       | 3360008 | 392.43  | 258.57  | 4.875 |
| 54 | <i>NFATC2IP</i>     | 6520201 | 1067.35 | 733.93  | 4.869 |
| 55 | <i>CHMP2A</i>       | 3290181 | 150.65  | 228.52  | 4.869 |
| 56 | <i>ANO9</i>         | 5720373 | 27.58   | 4.05    | 4.848 |
| 57 | <i>NEURL4</i>       | 1990292 | 78.98   | 36.20   | 4.838 |
| 58 | <i>BRIP1</i>        | 5960730 | 8.03    | 31.67   | 4.829 |
| 59 | <i>WDR73</i>        | 4210332 | 110.07  | 65.82   | 4.829 |
| 60 | <i>BRE</i>          | 1400450 | 372.30  | 451.30  | 4.794 |
| 61 | <i>TK2</i>          | 5690053 | 51.30   | 96.08   | 4.789 |
| 62 | <i>PIAS1</i>        | 1820019 | 567.03  | 420.55  | 4.780 |
| 63 | <i>PCNT</i>         | 1510014 | 710.85  | 463.02  | 4.774 |
| 64 | <i>PUS1</i>         | 60092   | 1386.98 | 1058.78 | 4.769 |
| 65 | <i>ALDH6A1</i>      | 7100274 | 116.72  | 66.72   | 4.762 |
| 66 | <i>COG5</i>         | 1430577 | 203.15  | 98.00   | 4.761 |
| 67 | <i>FAM32A</i>       | 3780440 | 842.07  | 1060.72 | 4.753 |
| 68 | <i>LOC100129086</i> | 4760397 | 331.75  | 457.12  | 4.749 |
| 69 | <i>ATP6V0E1</i>     | 2320110 | 2541.35 | 3415.73 | 4.744 |
| 70 | <i>ZNF767</i>       | 5090544 | 75.00   | 45.78   | 4.734 |
| 71 | <i>CRADD</i>        | 1990291 | 199.03  | 259.50  | 4.714 |
| 72 | <i>TCERG1</i>       | 4490600 | 41.03   | 6.92    | 4.709 |
| 73 | <i>PXMP3</i>        | 1090288 | 288.30  | 428.72  | 4.704 |
| 74 | <i>HNRPDL</i>       | 6860678 | 531.47  | 332.23  | 4.704 |
| 75 | <i>MARCH3</i>       | 780544  | 441.23  | 300.97  | 4.678 |
| 76 | <i>LOC646347</i>    | 7510209 | 782.08  | 1019.82 | 4.670 |
| 77 | <i>SNORA65</i>      | 2640019 | 9.20    | 72.53   | 4.669 |
| 78 | <i>MRII</i>         | 4860402 | 97.15   | 41.12   | 4.637 |
| 79 | <i>LYPLA1</i>       | 70300   | 267.13  | 399.48  | 4.623 |
| 80 | <i>ACAP1</i>        | 7210682 | 1615.35 | 1036.08 | 4.598 |
| 81 | <i>PITPNM1</i>      | 6960215 | 1274.90 | 635.28  | 4.591 |
| 82 | <i>LOC100132707</i> | 6580500 | 75.28   | 32.83   | 4.580 |
| 83 | <i>RHEB</i>         | 2450139 | 1227.22 | 1639.20 | 4.569 |

|     |                     |         |         |         |       |
|-----|---------------------|---------|---------|---------|-------|
| 84  | <i>LOC645969</i>    | 2750441 | 173.27  | 285.58  | 4.555 |
| 85  | <i>GNL3L</i>        | 5900746 | 835.20  | 525.42  | 4.542 |
| 86  | <i>PRR14</i>        | 7570711 | 1731.32 | 1435.67 | 4.525 |
| 87  | <i>AZII</i>         | 3390605 | 211.15  | 132.97  | 4.518 |
| 88  | <i>TNFSF13</i>      | 2140040 | 51.55   | 130.52  | 4.498 |
| 89  | <i>ZNF234</i>       | 5720072 | 80.88   | 44.17   | 4.498 |
| 90  | <i>SEC22C</i>       | 7000386 | 120.37  | 179.15  | 4.443 |
| 91  | <i>TATDN3</i>       | 6020368 | 139.93  | 189.23  | 4.442 |
| 92  | <i>MTA2</i>         | 2000204 | 291.53  | 194.07  | 4.430 |
| 93  | <i>SERP1</i>        | 1770541 | 844.45  | 1182.87 | 4.429 |
| 94  | <i>PRPS1</i>        | 4780521 | 1013.02 | 671.53  | 4.424 |
| 95  | <i>ST3GAL1</i>      | 1300601 | 770.65  | 440.25  | 4.423 |
| 96  | <i>D2HGDH</i>       | 2710129 | 276.40  | 133.62  | 4.401 |
| 97  | <i>LOC728666</i>    | 1110487 | 390.08  | 626.28  | 4.399 |
| 98  | <i>EDC4</i>         | 6960037 | 767.75  | 565.67  | 4.362 |
| 99  | <i>UPF2</i>         | 5390603 | 389.77  | 233.18  | 4.349 |
| 100 | <i>STMN3</i>        | 4780224 | 2431.45 | 1385.75 | 4.346 |
| 101 | <i>HSPA1L</i>       | 6280471 | 352.75  | 207.25  | 4.341 |
| 102 | <i>CD36</i>         | 1010592 | 1330.25 | 2710.03 | 4.332 |
| 103 | <i>EZR</i>          | 2100612 | 8308.13 | 6158.52 | 4.318 |
| 104 | <i>CLPTM1</i>       | 770168  | 447.03  | 293.50  | 4.291 |
| 105 | <i>PLA2G4B</i>      | 2350722 | 857.63  | 484.65  | 4.290 |
| 106 | <i>RNF217</i>       | 6380048 | 9.48    | 32.20   | 4.286 |
| 107 | <i>TBC1D10C</i>     | 5050603 | 2504.80 | 1604.35 | 4.276 |
| 108 | <i>SCNM1</i>        | 6350070 | 256.05  | 352.42  | 4.274 |
| 109 | <i>C9ORF72</i>      | 3990411 | 110.28  | 261.98  | 4.262 |
| 110 | <i>GATAD2B</i>      | 2370576 | 365.52  | 211.90  | 4.259 |
| 111 | <i>ZNF526</i>       | 2750040 | 75.48   | 41.32   | 4.251 |
| 112 | <i>LSM10</i>        | 160255  | 685.98  | 927.23  | 4.244 |
| 113 | <i>LOC100128510</i> | 5670431 | 310.03  | 149.52  | 4.244 |
| 114 | <i>TTC14</i>        | 7000240 | 313.98  | 202.08  | 4.243 |
| 115 | <i>ZMYND11</i>      | 1190626 | 2634.08 | 1754.93 | 4.239 |
| 116 | <i>MTMR14</i>       | 2470068 | 631.07  | 863.43  | 4.232 |
| 117 | <i>C17ORF41</i>     | 6290070 | 38.35   | 11.93   | 4.230 |
| 118 | <i>TAF5L</i>        | 2320292 | 131.37  | 55.27   | 4.226 |
| 119 | <i>SMS</i>          | 4490341 | 979.95  | 1251.57 | 4.213 |
| 120 | <i>CNIH</i>         | 3120767 | 410.55  | 598.47  | 4.198 |
| 121 | <i>HS.439031</i>    | 2070445 | 27.83   | 12.73   | 4.196 |
| 122 | <i>CCS</i>          | 2750630 | 75.03   | 43.22   | 4.195 |
| 123 | <i>NP1P</i>         | 1070070 | 503.42  | 303.78  | 4.194 |
| 124 | <i>TAF1C</i>        | 6380131 | 1390.53 | 811.35  | 4.179 |
| 125 | <i>LOC440731</i>    | 4010270 | 119.50  | 224.80  | 4.173 |
| 126 | <i>GTF2A1</i>       | 5910133 | 68.88   | 44.35   | 4.171 |

|     |                   |         |         |         |       |
|-----|-------------------|---------|---------|---------|-------|
| 127 | <i>EML3</i>       | 3400397 | 1663.55 | 1186.53 | 4.167 |
| 128 | <i>NCRNA00120</i> | 7160730 | 7.82    | 31.70   | 4.166 |

---

**Table S2.** Differentially expressed genes between controls and BD patients

| <b>Rank</b> | <b>Gene symbol</b>  | <b>Probe ID</b> | <b>Mean Controls</b> | <b>Mean BD</b> | <b>-log10(p-value)</b> |
|-------------|---------------------|-----------------|----------------------|----------------|------------------------|
| 1           | <i>PAK1IP1</i>      | 1990575         | 199.27               | 137.17         | 6.914                  |
| 2           | <i>UBQLN2</i>       | 5560482         | 1633.40              | 1082.67        | 6.560                  |
| 3           | <i>NUCKS1</i>       | 4880445         | 4877.38              | 3327.17        | 6.269                  |
| 4           | <i>ATP8B2</i>       | 6960168         | 977.42               | 488.68         | 6.092                  |
| 5           | <i>PBX2</i>         | 5820681         | 446.10               | 215.63         | 5.908                  |
| 6           | <i>HINT3</i>        | 2140279         | 661.07               | 1863.58        | 5.780                  |
| 7           | <i>PPARBP</i>       | 1070195         | 647.10               | 477.17         | 5.747                  |
| 8           | <i>ZNF641</i>       | 6650747         | 104.62               | 49.32          | 5.733                  |
| 9           | <i>LOC728649</i>    | 4610315         | 27.70                | 148.53         | 5.685                  |
| 10          | <i>LOC100131360</i> | 1940025         | 164.93               | 85.22          | 5.672                  |
| 11          | <i>ALDH6A1</i>      | 7100274         | 116.72               | 57.60          | 5.626                  |
| 12          | <i>FBXW11</i>       | 3460711         | 820.33               | 475.82         | 5.551                  |
| 13          | <i>SNORA65</i>      | 2640019         | 9.20                 | 83.18          | 5.461                  |
| 14          | <i>COG5</i>         | 1430577         | 203.15               | 83.68          | 5.413                  |
| 15          | <i>SAFB2</i>        | 2850091         | 1492.55              | 1096.37        | 5.307                  |
| 16          | <i>MTP18</i>        | 6450184         | 7.60                 | 34.00          | 5.302                  |
| 17          | <i>GTF2A1</i>       | 5910133         | 68.88                | 38.25          | 5.259                  |
| 18          | <i>EEF2</i>         | 1580292         | 15407.50             | 11164.07       | 5.230                  |
| 19          | <i>TAF15</i>        | 10176           | 3835.98              | 2018.23        | 5.209                  |
| 20          | <i>LSM14B</i>       | 2360754         | 22.15                | 5.20           | 5.178                  |
| 21          | <i>CARHSP1</i>      | 1230348         | 1011.63              | 561.02         | 5.172                  |
| 22          | <i>ZNF319</i>       | 3180315         | 527.62               | 385.93         | 5.144                  |
| 23          | <i>MTF2</i>         | 2760255         | 790.62               | 603.77         | 5.087                  |
| 24          | <i>PITPNM1</i>      | 6960215         | 1274.90              | 569.78         | 5.077                  |
| 25          | <i>FASTK</i>        | 770687          | 912.35               | 635.83         | 5.072                  |
| 26          | <i>DNAJC7</i>       | 3290037         | 552.73               | 349.10         | 5.037                  |
| 27          | <i>CLPTM1</i>       | 770168          | 447.03               | 269.08         | 5.010                  |
| 28          | <i>UBE2E1</i>       | 4050070         | 93.70                | 52.95          | 4.939                  |
| 29          | <i>HS.573106</i>    | 4390451         | 10.30                | -4.33          | 4.932                  |
| 30          | <i>FBXW11</i>       | 510253          | 113.82               | 64.63          | 4.826                  |
| 31          | <i>ZNF234</i>       | 5720072         | 80.88                | 41.70          | 4.815                  |
| 32          | <i>RNY4</i>         | 1070079         | 80.03                | 347.28         | 4.794                  |
| 33          | <i>LOC100129509</i> | 6400343         | 11.10                | -4.87          | 4.757                  |
| 34          | <i>ALKBH5</i>       | 1400209         | 6750.58              | 5578.07        | 4.735                  |
| 35          | <i>APIM1</i>        | 2190241         | 1817.53              | 1468.32        | 4.714                  |
| 36          | <i>MXRA7</i>        | 1820181         | 20.67                | 0.67           | 4.713                  |
| 37          | <i>THOC2</i>        | 2490397         | 966.20               | 668.52         | 4.696                  |
| 38          | <i>PRR14</i>        | 7570711         | 1731.32              | 1428.45        | 4.642                  |
| 39          | <i>SAFB2</i>        | 7050670         | 1591.58              | 1138.45        | 4.611                  |
| 40          | <i>HSPA1L</i>       | 6280471         | 352.75               | 199.57         | 4.586                  |

|    |                 |         |         |         |       |
|----|-----------------|---------|---------|---------|-------|
| 41 | <i>SUZ12</i>    | 4920619 | 3164.18 | 2236.62 | 4.541 |
| 42 | <i>PXMP3</i>    | 1090288 | 288.30  | 422.65  | 4.490 |
| 43 | <i>SFRS16</i>   | 2510722 | 195.30  | 104.02  | 4.483 |
| 44 | <i>C6ORF204</i> | 2000564 | 204.80  | 94.43   | 4.457 |
| 45 | <i>HUWE1</i>    | 6980332 | 144.53  | 104.25  | 4.449 |
| 46 | <i>ALDH6A1</i>  | 5820373 | 226.37  | 126.45  | 4.411 |
| 47 | <i>ATP6V1F</i>  | 3870630 | 2322.43 | 2929.05 | 4.410 |
| 48 | <i>IL7R</i>     | 3830349 | 3297.30 | 1665.37 | 4.365 |
| 49 | <i>ZC3H4</i>    | 5820608 | 1465.00 | 1010.78 | 4.339 |
| 50 | <i>SNORD101</i> | 3400139 | 0.55    | 28.83   | 4.331 |
| 51 | <i>SMURF1</i>   | 840598  | 32.38   | 68.37   | 4.303 |
| 52 | <i>LSM5</i>     | 6650133 | 324.40  | 229.03  | 4.217 |
| 53 | <i>NDUFC1</i>   | 1110575 | 1085.17 | 886.83  | 4.214 |
| 54 | <i>C2ORF27B</i> | 2120446 | -5.03   | 8.32    | 4.188 |
| 55 | <i>MIER3</i>    | 6100092 | -4.88   | 10.72   | 4.167 |
| 56 | <i>ARID4B</i>   | 2470603 | 586.08  | 351.70  | 3.487 |

---

**Table S3.** Differentially expressed genes between BD patients and unaffected offspring

| <b>Rank</b> | <b>Gene symbol</b>  | <b>Probe ID</b> | <b>Mean Offspring</b> | <b>Mean BD</b> | <b>-log<sub>10</sub>(p-value)</b> |
|-------------|---------------------|-----------------|-----------------------|----------------|-----------------------------------|
| 1           | <i>NIPSNAP3A</i>    | 2490100         | 346.08                | 214.80         | 5.028                             |
| 2           | <i>LOC648226</i>    | 4060452         | 2.18                  | 19.97          | 4.957                             |
| 3           | <i>LOC23117</i>     | 2850400         | 2268.88               | 3798.75        | 4.614                             |
| 4           | <i>TNPO2</i>        | 2450382         | 559.57                | 720.15         | 4.601                             |
| 5           | <i>GPR177</i>       | 6130136         | 159.13                | 50.53          | 4.520                             |
| 6           | <i>LOC100130138</i> | 4890653         | 8.18                  | 27.77          | 4.497                             |
| 7           | <i>LOC613037</i>    | 2760189         | 351.17                | 533.33         | 4.401                             |
| 8           | <i>LRP3</i>         | 730458          | 457.68                | 191.43         | 4.397                             |
| 9           | <i>LOC729978</i>    | 6980601         | 2568.68               | 4299.57        | 4.389                             |
| 10          | <i>S100Z</i>        | 5870338         | 187.77                | 90.42          | 4.290                             |
| 11          | <i>FLJ40113</i>     | 2320603         | -9.07                 | 6.02           | 4.286                             |
| 12          | <i>LRP5L</i>        | 540403          | 141.42                | 276.77         | 4.269                             |

**Table S4.** Differentially methylated probes between controls and unaffected offspring

| <b>Rank</b> | <b>Index</b> | <b>Target D</b> | <b>Controls<br/>AVG Beta</b> | <b>Offspring<br/>AVG Beta</b> | <b>Delta Beta</b> | <b>Illumina<br/>Gene Annotation</b> |
|-------------|--------------|-----------------|------------------------------|-------------------------------|-------------------|-------------------------------------|
| 1           | 10788        | cg05593887      | 0.17765                      | 0.82772                       | 0.65007           | <i>MAGI2</i>                        |
| 2           | 439894       | cg25099095      | 0.71343                      | 0.18537                       | -0.52806          |                                     |
| 3           | 232939       | cg12515659      | 0.20226                      | 0.6958                        | 0.49354           | <i>FAM134B</i>                      |
| 4           | 244024       | cg13232075      | 0.26133                      | 0.73814                       | 0.4768            |                                     |
| 5           | 164958       | cg08522473      | 0.46799                      | 0.92582                       | 0.45783           | <i>TAGLN3</i>                       |
| 6           | 485539       | rs2208123       | 0.63222                      | 0.18306                       | -0.44916          |                                     |
| 7           | 420903       | cg23943944      | 0.73918                      | 0.2918                        | -0.44738          |                                     |
| 8           | 341341       | cg18816122      | 0.10999                      | 0.54603                       | 0.43604           | <i>PLEKHG4B</i>                     |
| 9           | 418678       | cg23804921      | 0.66943                      | 0.23467                       | -0.43475          |                                     |
| 10          | 125395       | cg06417478      | 0.49136                      | 0.06335                       | -0.42801          | <i>HOOK2</i>                        |
| 11          | 825          | cg00033213      | 0.76162                      | 0.34312                       | -0.4185           | <i>TOP1MT</i>                       |
| 12          | 140429       | cg07179329      | 0.81228                      | 0.40225                       | -0.41004          | <i>CDH13</i>                        |
| 13          | 485542       | rs2468330       | 0.40563                      | 0.80961                       | 0.40398           |                                     |
| 14          | 357637       | cg19848924      | 0.8485                       | 0.44559                       | -0.40292          |                                     |
| 15          | 214900       | cg11418607      | 0.20225                      | 0.59598                       | 0.39373           |                                     |
| 16          | 485572       | rs9292570       | 0.47504                      | 0.8672                        | 0.39216           |                                     |
| 17          | 1113         | cg00045070      | 0.2168                       | 0.59676                       | 0.37996           | <i>PCSK9</i>                        |
| 18          | 275290       | cg14795227      | 0.66052                      | 0.28297                       | -0.37755          |                                     |
| 19          | 145092       | cg07437919      | 0.52561                      | 0.14916                       | -0.37645          | <i>SLC45A4</i>                      |
| 20          | 236587       | cg12743416      | 0.43029                      | 0.05617                       | -0.37412          | <i>TRIM24</i>                       |
| 21          | 178385       | cg09289202      | 0.32759                      | 0.70086                       | 0.37327           | <i>STK25</i>                        |
| 22          | 151617       | cg07791065      | 0.48947                      | 0.85983                       | 0.37036           |                                     |
| 23          | 297138       | cg16147201      | 0.70586                      | 0.33572                       | -0.37014          |                                     |
| 24          | 59125        | cg02907150      | 0.42158                      | 0.78546                       | 0.36387           | <i>PCNX</i>                         |
| 25          | 27242        | cg01303420      | 0.73203                      | 0.37015                       | -0.36188          | <i>C3orf55</i>                      |
| 26          | 214578       | cg11401796      | 0.84504                      | 0.49041                       | -0.35463          | <i>C21orf70</i>                     |
| 27          | 162978       | cg08412936      | 0.74738                      | 0.40151                       | -0.34588          | <i>PSORS1C1</i>                     |
| 28          | 163134       | cg08422420      | 0.12593                      | 0.46952                       | 0.34359           | <i>SDHAP3</i>                       |
| 29          | 190626       | cg10000195      | 0.83652                      | 0.49385                       | -0.34267          |                                     |
| 30          | 220895       | cg11792281      | 0.54053                      | 0.19843                       | -0.3421           | <i>NLK</i>                          |
| 31          | 424315       | cg24136292      | 0.19632                      | 0.53542                       | 0.33909           | <i>INSC</i>                         |
| 32          | 154968       | cg07973095      | 0.21551                      | 0.55264                       | 0.33713           | <i>DECR2</i>                        |
| 33          | 461936       | cg26472636      | 0.18363                      | 0.52064                       | 0.33701           | <i>SDHAP3</i>                       |
| 34          | 328253       | cg18030105      | 0.6985                       | 0.36216                       | -0.33634          | <i>ZNF195</i>                       |
| 35          | 157273       | cg08104845      | 0.70519                      | 0.36939                       | -0.3358           | <i>GLUL</i>                         |
| 36          | 288040       | cg15600437      | 0.87072                      | 0.53831                       | -0.3324           | <i>MFAP2</i>                        |
| 37          | 182703       | cg09533869      | 0.12189                      | 0.45421                       | 0.33232           | <i>PGCP</i>                         |
| 38          | 169447       | cg08778598      | 0.15171                      | 0.4837                        | 0.33199           | <i>SDHAP3</i>                       |
| 39          | 404358       | cg22926869      | 0.6972                       | 0.36743                       | -0.32977          | <i>HHLA2</i>                        |

|    |        |            |         |         |          |                                        |
|----|--------|------------|---------|---------|----------|----------------------------------------|
| 40 | 300021 | cg16316162 | 0.03761 | 0.36569 | 0.32808  | <i>NAPRT1</i>                          |
| 41 | 377036 | cg21117559 | 0.66503 | 0.33811 | -0.32692 | <i>STARD13</i>                         |
| 42 | 376323 | cg21070081 | 0.51683 | 0.84299 | 0.32615  |                                        |
| 43 | 223895 | cg11957130 | 0.61246 | 0.28831 | -0.32415 | <i>ATXN7L1</i>                         |
| 44 | 246480 | cg13379757 | 0.78811 | 0.46513 | -0.32298 |                                        |
| 45 | 452582 | cg25929399 | 0.19389 | 0.51681 | 0.32292  | <i>KRT38</i>                           |
| 46 | 192367 | cg10098373 | 0.77258 | 0.45028 | -0.32229 | <i>CPT1A</i>                           |
| 47 | 485554 | rs5926356  | 0.35218 | 0.67312 | 0.32094  |                                        |
| 48 | 479924 | cg27521571 | 0.82631 | 0.50634 | -0.31997 | <i>COMT</i>                            |
| 49 | 218975 | cg11680857 | 0.69479 | 0.37499 | -0.3198  | <i>LCE2D</i>                           |
| 50 | 302831 | cg16471877 | 0.6782  | 0.35857 | -0.31963 | <i>COQ3</i>                            |
| 51 | 151367 | cg07777042 | 0.85598 | 0.53782 | -0.31816 |                                        |
| 52 | 282760 | cg15251140 | 0.64789 | 0.33263 | -0.31526 |                                        |
| 53 | 420129 | cg23899408 | 0.47816 | 0.16322 | -0.31494 | <i>HOOK2</i>                           |
| 54 | 389523 | cg21931717 | 0.08616 | 0.39962 | 0.31345  | <i>SDHAP3</i>                          |
| 55 | 52721  | cg02587993 | 0.88235 | 0.56971 | -0.31264 |                                        |
| 56 | 321732 | cg17605604 | 0.60023 | 0.28846 | -0.31177 | <i>C5orf30</i>                         |
| 57 | 87981  | cg04383836 | 0.64893 | 0.33766 | -0.31127 | <i>USP43</i>                           |
| 58 | 28217  | cg01356752 | 0.83381 | 0.52285 | -0.31096 |                                        |
| 59 | 237381 | cg12798564 | 0.7643  | 0.45567 | -0.30864 |                                        |
| 60 | 338890 | cg18669823 | 0.62958 | 0.32139 | -0.30819 |                                        |
| 61 | 430609 | cg24534774 | 0.26134 | 0.56927 | 0.30793  |                                        |
| 62 | 485521 | rs10936224 | 0.64588 | 0.33836 | -0.30751 |                                        |
| 63 | 485534 | rs1941955  | 0.69993 | 0.39409 | -0.30584 |                                        |
| 64 | 301482 | cg16398051 | 0.77396 | 0.46897 | -0.30499 | <i>ADAMTS17</i>                        |
| 65 | 437392 | cg24937727 | 0.18563 | 0.49058 | 0.30495  | <i>RGL3</i>                            |
| 66 | 1158   | cg00047185 | 0.76042 | 0.45612 | -0.3043  | <i>MIR526B</i>                         |
| 67 | 167786 | cg08683088 | 0.72006 | 0.41583 | -0.30424 | <i>ELOVL2</i>                          |
| 68 | 355076 | cg19707653 | 0.7376  | 0.4353  | -0.3023  | <i>KIAA1671</i>                        |
| 69 | 74862  | cg03706056 | 0.23804 | 0.54032 | 0.30228  | <i>SETD4</i>                           |
| 70 | 199608 | cg10508111 | 0.8335  | 0.53137 | -0.30212 | <i>PFKM</i>                            |
| 71 | 28700  | cg01381374 | 0.60786 | 0.30602 | -0.30184 |                                        |
| 72 | 100886 | cg05059349 | 0.24652 | 0.54792 | 0.3014   |                                        |
| 73 | 108689 | cg05477582 | 0.79757 | 0.49626 | -0.30131 | <i>CMTM1</i>                           |
| 74 | 383609 | cg21544585 | 0.80007 | 0.49928 | -0.30079 | <i>TMEM155;</i><br><i>LOC100192379</i> |
| 75 | 263104 | cg14179288 | 0.5044  | 0.80462 | 0.30022  | <i>TLE4</i>                            |

---



**Table S5.** Differentially methylated probes between controls and BD patients

| <b>Rank</b> | <b>Index</b> | <b>Target ID</b> | <b>Controls<br/>AVG Beta</b> | <b>BD AVG<br/>Beta</b> | <b>Delta<br/>Beta</b> | <b>Illumina<br/>Gene Annotation</b> |
|-------------|--------------|------------------|------------------------------|------------------------|-----------------------|-------------------------------------|
| 1           | 348332       | cg19285525       | 0.20847                      | 0.68924                | 0.48078               | <i>RBMS1</i>                        |
| 2           | 244024       | cg13232075       | 0.26133                      | 0.74139                | 0.48005               |                                     |
| 3           | 448561       | cg25649515       | 0.44069                      | 0.91658                | 0.47589               |                                     |
| 4           | 110788       | cg05593887       | 0.17765                      | 0.63184                | 0.45419               | <i>MAGI2</i>                        |
| 5           | 383107       | cg21514997       | 0.15867                      | 0.5992                 | 0.44054               | <i>CCDC148</i>                      |
| 6           | 125395       | cg06417478       | 0.49136                      | 0.05731                | -0.43405              | <i>HOOK2</i>                        |
| 7           | 182703       | cg09533869       | 0.12189                      | 0.54351                | 0.42162               | <i>PGCP</i>                         |
| 8           | 485542       | rs2468330        | 0.40563                      | 0.80799                | 0.40235               |                                     |
| 9           | 485561       | rs6546473        | 0.40975                      | 0.8096                 | 0.39985               |                                     |
| 10          | 485566       | rs739259         | 0.22973                      | 0.62793                | 0.3982                |                                     |
| 11          | 389458       | cg21927991       | 0.85012                      | 0.457                  | -0.39312              | <i>ZFAT</i>                         |
| 12          | 261966       | cg14123034       | 0.57669                      | 0.18501                | -0.39169              | <i>L3MBTL4</i>                      |
| 13          | 485538       | rs213028         | 0.33747                      | 0.72259                | 0.38512               |                                     |
| 14          | 116088       | cg05890457       | 0.45391                      | 0.83665                | 0.38274               | <i>ARHGEF10</i>                     |
| 15          | 246480       | cg13379757       | 0.78811                      | 0.40578                | -0.38234              |                                     |
| 16          | 485516       | rs10457834       | 0.72943                      | 0.35151                | -0.37792              |                                     |
| 17          | 447746       | cg25599641       | 0.92394                      | 0.55674                | -0.3672               | <i>NAGA</i>                         |
| 18          | 311144       | cg16954525       | 0.32197                      | 0.68911                | 0.36713               | <i>MS4A4A</i>                       |
| 19          | 145092       | cg07437919       | 0.52561                      | 0.15922                | -0.36639              | <i>SLC45A4</i>                      |
| 20          | 59125        | cg02907150       | 0.42158                      | 0.78787                | 0.36629               | <i>PCNX</i>                         |
| 21          | 223881       | cg11956442       | 0.41016                      | 0.77368                | 0.36352               |                                     |
| 22          | 365865       | cg20381372       | 0.33843                      | 0.70088                | 0.36245               | <i>LOC100134317</i>                 |
| 23          | 367053       | cg20459037       | 0.68591                      | 0.32398                | -0.36193              | <i>WDR16</i>                        |
| 24          | 157273       | cg08104845       | 0.70519                      | 0.34573                | -0.35946              | <i>GLUL</i>                         |
| 25          | 161458       | cg08320316       | 0.43367                      | 0.78756                | 0.35389               | <i>RNF216</i>                       |
| 26          | 119400       | cg06064179       | 0.79699                      | 0.44637                | -0.35062              | <i>PLEKHM1P</i>                     |
| 27          | 418678       | cg23804921       | 0.66943                      | 0.31977                | -0.34966              |                                     |
| 28          | 472472       | cg27076160       | 0.74071                      | 0.39342                | -0.34729              | <i>ZNF365</i>                       |
| 29          | 213402       | cg11331837       | 0.42954                      | 0.7728                 | 0.34326               |                                     |
| 30          | 407120       | cg23084506       | 0.54129                      | 0.20045                | -0.34084              | <i>PRAMEF5</i>                      |
| 31          | 220895       | cg11792281       | 0.54053                      | 0.20127                | -0.33926              | <i>NLK</i>                          |
| 32          | 170144       | cg08820231       | 0.30405                      | 0.64127                | 0.33723               | <i>SLC26A10</i>                     |
| 33          | 7278         | cg00345083       | 0.30289                      | 0.63962                | 0.33674               | <i>AJAPI</i>                        |
| 34          | 394844       | cg22304519       | 0.73788                      | 0.40221                | -0.33567              |                                     |
| 35          | 485531       | rs1510189        | 0.3942                       | 0.72938                | 0.33518               |                                     |
| 36          | 420129       | cg23899408       | 0.47816                      | 0.14788                | -0.33028              | <i>HOOK2</i>                        |
| 37          | 294557       | cg15991478       | 0.81759                      | 0.48735                | -0.33024              | <i>UBD</i>                          |
| 38          | 357637       | cg19848924       | 0.8485                       | 0.51997                | -0.32854              |                                     |
| 39          | 96767        | cg04850148       | 0.37416                      | 0.70098                | 0.32682               | <i>CCL4L2; CCL4L1</i>               |

|    |        |            |         |         |          |                                 |
|----|--------|------------|---------|---------|----------|---------------------------------|
| 40 | 146302 | cg07501029 | 0.39536 | 0.72178 | 0.32643  | <i>KIF26B</i>                   |
| 41 | 251419 | cg13612055 | 0.49681 | 0.8211  | 0.3243   | <i>RNU5E; RNU5D;<br/>ACOT12</i> |
| 42 | 140933 | cg07205452 | 0.90026 | 0.57751 | -0.32274 | <i>PRDM10</i>                   |
| 43 | 374956 | cg20979384 | 0.28228 | 0.60258 | 0.3203   |                                 |
| 44 | 143037 | cg07319199 | 0.83807 | 0.51884 | -0.31923 | <i>ANTXR1</i>                   |
| 45 | 200687 | cg10568066 | 0.3007  | 0.61986 | 0.31917  | <i>RNF39</i>                    |
| 46 | 190626 | cg10000195 | 0.83652 | 0.51888 | -0.31764 |                                 |
| 47 | 207438 | cg10975354 | 0.1159  | 0.43351 | 0.31761  | <i>VPS13A; LOC100286938</i>     |
| 48 | 478174 | cg27415324 | 0.72948 | 0.41529 | -0.31419 |                                 |
| 49 | 36864  | cg01800061 | 0.91661 | 0.60309 | -0.31352 | <i>MIR519B; MIR526B</i>         |
| 50 | 125277 | cg06409538 | 0.54335 | 0.23001 | -0.31334 |                                 |
| 51 | 328253 | cg18030105 | 0.6985  | 0.38556 | -0.31294 | <i>ZNF195</i>                   |
| 52 | 468599 | cg26856631 | 0.50776 | 0.19611 | -0.31164 | <i>LSM5</i>                     |
| 53 | 485565 | rs715359   | 0.66521 | 0.35434 | -0.31088 |                                 |
| 54 | 189001 | cg09900440 | 0.75651 | 0.44819 | -0.30832 | <i>HLA-DPA1</i>                 |
| 55 | 323047 | cg17707870 | 0.12268 | 0.43009 | 0.3074   | <i>LHFP</i>                     |
| 56 | 303705 | cg16523115 | 0.59026 | 0.89605 | 0.30578  | <i>IL20RB</i>                   |
| 57 | 116629 | cg05918715 | 0.77954 | 0.47426 | -0.30528 | <i>SHISA2</i>                   |
| 58 | 218975 | cg11680857 | 0.69479 | 0.38959 | -0.3052  | <i>LCE2D</i>                    |
| 59 | 275290 | cg14795227 | 0.66052 | 0.35658 | -0.30394 |                                 |
| 60 | 27242  | cg01303420 | 0.73203 | 0.42815 | -0.30389 | <i>C3orf55</i>                  |
| 61 | 485575 | rs951295   | 0.36173 | 0.66553 | 0.30379  |                                 |
| 62 | 302713 | cg16464924 | 0.56818 | 0.87158 | 0.30339  | <i>GAA</i>                      |
| 63 | 461459 | cg26445985 | 0.34149 | 0.64327 | 0.30177  | <i>DENND2A</i>                  |
| 64 | 166866 | cg08629394 | 0.41257 | 0.71276 | 0.30018  |                                 |

---

**Table S6.** Differentially methylated probes between unaffected offspring and bipolar disorder patients

| <b>Rank</b> | <b>Index</b> | <b>Target ID</b> | <b>Offspring AVG Beta</b> | <b>BD AVG Beta</b> | <b>Delta Beta</b> | <b>Illumina Gene Annotation</b> |
|-------------|--------------|------------------|---------------------------|--------------------|-------------------|---------------------------------|
| 1           | 261966       | cg14123034       | 0.69639                   | 0.18379            | -0.5126           | <i>L3MBTL4</i>                  |
| 2           | 232939       | cg12515659       | 0.68621                   | 0.21166            | -0.47455          | <i>FAM134B</i>                  |
| 3           | 485539       | rs2208123        | 0.18016                   | 0.6173             | 0.43714           |                                 |
| 4           | 1113         | cg00045070       | 0.5902                    | 0.16964            | -0.42056          | <i>PCSK9</i>                    |
| 5           | 162978       | cg08412936       | 0.39844                   | 0.81823            | 0.41979           | <i>PSORS1C1</i>                 |
| 6           | 420903       | cg23943944       | 0.29044                   | 0.70992            | 0.41947           |                                 |
| 7           | 145228       | cg07446795       | 0.87965                   | 0.46651            | -0.41313          | <i>CCDC40</i>                   |
| 8           | 140429       | cg07179329       | 0.40153                   | 0.8042             | 0.40267           | <i>CDH13</i>                    |
| 9           | 116300       | cg05900567       | 0.59664                   | 0.19687            | -0.39976          |                                 |
| 10          | 485538       | rs213028         | 0.3321                    | 0.72101            | 0.38891           |                                 |
| 11          | 460690       | cg26398228       | 0.34913                   | 0.72761            | 0.37848           |                                 |
| 12          | 407120       | cg23084506       | 0.56815                   | 0.19767            | -0.37048          | <i>PRAMEF5</i>                  |
| 13          | 119400       | cg06064179       | 0.79083                   | 0.42867            | -0.36217          | <i>PLEKHM1P</i>                 |
| 14          | 485537       | rs2125573        | 0.73229                   | 0.37576            | -0.35653          |                                 |
| 15          | 6860         | cg00325917       | 0.48153                   | 0.8371             | 0.35558           | <i>SELL</i>                     |
| 16          | 164958       | cg08522473       | 0.92101                   | 0.57185            | -0.34915          | <i>TAGLN3</i>                   |
| 17          | 179474       | cg09351263       | 0.54725                   | 0.19839            | -0.34886          |                                 |
| 18          | 419138       | cg23836570       | 0.5326                    | 0.87885            | 0.34625           | <i>FBRSL1</i>                   |
| 19          | 213127       | cg11314779       | 0.8831                    | 0.53801            | -0.34509          |                                 |
| 20          | 485518       | rs10796216       | 0.55979                   | 0.21687            | -0.34292          |                                 |
| 21          | 396292       | cg22402398       | 0.74372                   | 0.4018             | -0.34192          | <i>FGR</i>                      |
| 22          | 350115       | cg19405842       | 0.88288                   | 0.54172            | -0.34116          | <i>PRKCZ</i>                    |
| 23          | 223881       | cg11956442       | 0.42945                   | 0.76728            | 0.33783           |                                 |
| 24          | 463816       | cg26576978       | 0.45006                   | 0.78547            | 0.33541           |                                 |
| 25          | 116108       | cg05891136       | 0.58946                   | 0.92431            | 0.33486           | <i>MYOM2</i>                    |
| 26          | 476971       | cg27341708       | 0.24295                   | 0.57466            | 0.33171           | <i>MAML3</i>                    |
| 27          | 202953       | cg10701801       | 0.06483                   | 0.39634            | 0.33151           | <i>OSBPL9</i>                   |
| 28          | 189001       | cg09900440       | 0.77725                   | 0.44612            | -0.33113          | <i>HLA-DPA1</i>                 |
| 29          | 178385       | cg09289202       | 0.69895                   | 0.37018            | -0.32877          | <i>STK25</i>                    |
| 30          | 153179       | cg07876831       | 0.76254                   | 0.43471            | -0.32783          | <i>TMCO3</i>                    |
| 31          | 301482       | cg16398051       | 0.46819                   | 0.79593            | 0.32774           | <i>ADAMTS17</i>                 |
| 32          | 66803        | cg03299990       | 0.32387                   | 0.6491             | 0.32523           |                                 |
| 33          | 235770       | cg12687426       | 0.59724                   | 0.92012            | 0.32288           | <i>KCNMB3</i>                   |
| 34          | 74862        | cg03706056       | 0.5352                    | 0.21428            | -0.32092          | <i>SETD4</i>                    |
| 35          | 348332       | cg19285525       | 0.36288                   | 0.68247            | 0.3196            | <i>RBMS1</i>                    |
| 36          | 151367       | cg07777042       | 0.52756                   | 0.84707            | 0.3195            |                                 |
| 37          | 687          | cg00028022       | 0.5443                    | 0.22536            | -0.31894          |                                 |
| 38          | 375699       | cg21028319       | 0.67159                   | 0.35529            | -0.3163           | <i>TM2D2</i>                    |

|    |        |            |         |         |          |                                   |
|----|--------|------------|---------|---------|----------|-----------------------------------|
| 39 | 311264 | cg16963093 | 0.69048 | 0.37654 | -0.31394 | <i>ATXN7L1</i>                    |
| 40 | 297138 | cg16147201 | 0.33515 | 0.64603 | 0.31089  |                                   |
| 41 | 21693  | cg01029331 | 0.61995 | 0.9284  | 0.30845  | <i>SDHAP1</i>                     |
| 42 | 485516 | rs10457834 | 0.65718 | 0.34991 | -0.30728 |                                   |
| 43 | 439894 | cg25099095 | 0.1846  | 0.49178 | 0.30718  |                                   |
| 44 | 185098 | cg09672255 | 0.53597 | 0.84182 | 0.30585  | <i>ZNF879</i>                     |
| 45 | 485572 | rs9292570  | 0.86523 | 0.56142 | -0.30382 |                                   |
| 46 | 36864  | cg01800061 | 0.89669 | 0.59348 | -0.30321 | <i>MIR519B;</i><br><i>MIR526B</i> |
| 47 | 395319 | cg22337626 | 0.66367 | 0.361   | -0.30266 | <i>MAST2</i>                      |

---

**Table S7.** Top networks enriched in the list of risk genes for BD

| <b>ID</b> | <b>Molecules in Network</b>                                                                                                                                                                                                                                                                                                                                                                                                    | <b>Score</b> | <b>Focus Molecules</b> | <b>Top Diseases and Functions</b>                                                      |
|-----------|--------------------------------------------------------------------------------------------------------------------------------------------------------------------------------------------------------------------------------------------------------------------------------------------------------------------------------------------------------------------------------------------------------------------------------|--------------|------------------------|----------------------------------------------------------------------------------------|
| 1         | 2010109I03Rik, ADRB2, <b>ALDH6A1</b> , APP, <b>ARID4B</b> , <b>ATP6V1F</b> , beta-estradiol, C14orf93, CASP3, <b>CLASRP</b> , <b>CLPTM1</b> , <b>COG5</b> , FOS, <b>GLUL</b> , GPR61, GPR78, GPR85, GPR88, GPR139, GPR173, <b>HINT3</b> , <b>HOOK2</b> , IGSF6, <b>LSM14B</b> , <b>MAGI2</b> , MOV10, NTRK1, <b>NUCKS1</b> , <b>PBX2</b> , <b>PCNX</b> , <b>PEX2</b> , PIK3R2, <b>PRR14</b> , PTTG2, ZNF343                    | 37           | 16                     | Cancer, Organismal Injury and Abnormalities, Reproductive System Disease               |
| 2         | Androgen-AR, CACHD1, CD3, CDC42, CDC42SE1, CDC42SE2, CYP1A1, DNAJB14, <b>DNAJC7</b> , DNAJC8, EML4, <b>FBXW11</b> , <b>GTF2A1</b> , <b>HSPA1L</b> , <b>HUWE1</b> , <b>IL7R</b> , indonol, INF2, LPIN2, MAP2K4/7, <b>MED1</b> , <b>MTF2</b> , NFkB (complex), POLR2F, POLR2K, RNA pol2-transcription factor, <b>SAFB2</b> , <b>SNORA65</b> , SUMO4, <b>SUZ12</b> , <b>TAF15</b> , <b>THOC2</b> , TRIM52, ZKSCAN1, <b>ZNF234</b> | 32           | 14                     | Cellular Development, Hematological System Development and Function, Hematopoiesis     |
| 3         | Anti-inflammatory Cytokine, <b>ATP8B2</b> , ATP9A, CHST3, <b>CPQ</b> , <b>FASTK</b> , GATM, GCC2, GNA14, IL4, ISG15, ITGBL1, ITPA, KITLG, <b>LCE2C/LCE2D</b> , LOXL1, LRRC32, METRNL, MNK1/2, MPHOSPH9, MYB, <b>NLK</b> , <b>PITPNM1</b> , RNF152, PNF220, SCGB3A1, SPRY1, TFAP2A, TGFB1, Tnfrsf22/Tnfrsr23, <b>UBE2E1</b> , VTCN1, Zfp35, <b>ZNF195</b> , <b>ZNF641</b>                                                       | 19           | 9                      | Hematological System Development and Function, Tissue Morphology, Cellular Development |
| 4         | LHX1, <b>SLC45A4</b>                                                                                                                                                                                                                                                                                                                                                                                                           | 3            | 1                      | Cell Death and Survival, Cellular Movement, Nervous System Development and Function    |

**Table S8.** List of genes showing a very strong correlation between expression and methylation ( $r^2 > |0.8|$ ).

| Rank | Gene            | Pearson's R | Rank | Gene          | Pearson's R |
|------|-----------------|-------------|------|---------------|-------------|
| 1    | <i>HLA-DRB5</i> | 0.9832      | 34   | <i>MALTI</i>  | 0.84992     |
| 2    | <i>HLA-DRB5</i> | 0.97487     | 35   | <i>SFRS18</i> | 0.84987     |
| 3    | <i>HLA-DRB5</i> | 0.95908     | 36   | <i>ANUBL1</i> | -0.84985    |
| 4    | <i>RAB34</i>    | -0.94641    | 37   | <i>PTPRN2</i> | -0.84947    |
| 5    | <i>RAB34</i>    | -0.94073    | 38   | <i>PTPRN2</i> | -0.84947    |
| 6    | <i>RAB34</i>    | -0.94067    | 39   | <i>PSMB8</i>  | 0.84916     |
| 7    | <i>HLA-DRB5</i> | 0.93113     | 40   | <i>ADARB2</i> | -0.84903    |
| 8    | <i>PBX2</i>     | -0.92892    | 41   | <i>GABRG2</i> | -0.84892    |
| 9    | <i>KIFC1</i>    | -0.92295    | 42   | <i>TFDPI</i>  | -0.84777    |
| 10   | <i>ZNF384</i>   | 0.9093      | 43   | <i>PRX</i>    | 0.84697     |
| 11   | <i>RAB34</i>    | -0.9045     | 44   | <i>FAM13A</i> | -0.84664    |
| 12   | <i>RIMBP2</i>   | -0.89906    | 45   | <i>HSPA1L</i> | 0.84606     |
| 13   | <i>NUCKS1</i>   | 0.89758     | 46   | <i>QKI</i>    | -0.84454    |
| 14   | <i>HLA-DRB5</i> | 0.89693     | 47   | <i>E2F4</i>   | 0.8439      |
| 15   | <i>RAB34</i>    | -0.89405    | 48   | <i>ASF1B</i>  | 0.84344     |
| 16   | <i>RAB34</i>    | -0.89279    | 49   | <i>MBNL3</i>  | 0.84257     |
| 17   | <i>UBAC2</i>    | -0.87961    | 50   | <i>ADPGK</i>  | -0.8411     |
| 18   | <i>TADA3</i>    | 0.87778     | 51   | <i>KDM2B</i>  | 0.84085     |
| 19   | <i>RAB34</i>    | -0.87489    | 52   | <i>TAF1C</i>  | 0.84057     |
| 20   | <i>SUPT6H</i>   | -0.87316    | 53   | <i>PTPRN2</i> | -0.83875    |
| 21   | <i>PBX2</i>     | -0.86884    | 54   | <i>ZNF692</i> | 0.83808     |
| 22   | <i>CENPT</i>    | 0.86767     | 55   | <i>BZW2</i>   | 0.83703     |
| 23   | <i>HLA-DRB5</i> | 0.86722     | 56   | <i>BCL2</i>   | -0.83665    |
| 24   | <i>PGAM4</i>    | 0.86576     | 57   | <i>SFRS18</i> | 0.83653     |
| 25   | <i>HSPA1L</i>   | 0.86424     | 58   | <i>SEPT9</i>  | -0.83409    |
| 26   | <i>PBX2</i>     | -0.86097    | 59   | <i>LSM14B</i> | -0.83365    |
| 27   | <i>RAB43</i>    | -0.86053    | 60   | <i>NUCKS1</i> | -0.83333    |
| 28   | <i>NUCKS1</i>   | 0.86032     | 61   | <i>METRNL</i> | 0.83154     |
| 29   | <i>MAP7</i>     | -0.857      | 62   | <i>USP5</i>   | 0.83114     |
| 30   | <i>MTF2</i>     | 0.85641     | 63   | <i>EIF1AY</i> | -0.83085    |
| 31   | <i>HLA-DRB5</i> | 0.85522     | 64   | <i>CD44</i>   | -0.83077    |
| 32   | <i>FASTK</i>    | 0.85387     | 65   | <i>MAML3</i>  | 0.83076     |
| 33   | <i>EIF1AY</i>   | -0.85039    | 66   | <i>MRAS</i>   | -0.82975    |

| Rank | Gene            | Pearson's R |
|------|-----------------|-------------|
| 67   | <i>TIAF1</i>    | -0.82758    |
| 68   | <i>DDX46</i>    | 0.82721     |
| 69   | <i>LDHB</i>     | 0.82517     |
| 70   | <i>HLA-DRB5</i> | -0.82501    |
| 71   | <i>KIAA1737</i> | -0.82487    |
| 72   | <i>MYOM1</i>    | 0.82189     |
| 73   | <i>ZNF384</i>   | 0.82185     |
| 74   | <i>SAE1</i>     | 0.8196      |
| 75   | <i>PTPRN2</i>   | -0.81954    |
| 76   | <i>CPSF1</i>    | 0.81819     |
| 77   | <i>NUCKS1</i>   | 0.818       |
| 78   | <i>ENC1</i>     | 0.81718     |
| 79   | <i>SLC22A17</i> | 0.81707     |
| 80   | <i>CCR4</i>     | 0.81637     |
| 81   | <i>PRDM16</i>   | -0.81578    |
| 82   | <i>DCUN1D4</i>  | -0.81524    |
| 83   | <i>MCM6</i>     | 0.81513     |
| 84   | <i>ITPKB</i>    | -0.81471    |
| 85   | <i>SMAD3</i>    | -0.81456    |
| 86   | <i>PTTG1</i>    | -0.81433    |
| 87   | <i>CSMD1</i>    | -0.81405    |
| 88   | <i>PGAM4</i>    | 0.8137      |
| 89   | <i>KIF17</i>    | -0.81316    |
| 90   | <i>RPS6KA3</i>  | -0.81309    |
| 91   | <i>PUM1</i>     | 0.81179     |
| 92   | <i>TIGD1</i>    | 0.81148     |
| 93   | <i>ZNF92</i>    | -0.81147    |
| 94   | <i>SEPT9</i>    | 0.81115     |
| 95   | <i>RAB11B</i>   | -0.81079    |
| 96   | <i>CD248</i>    | -0.8105     |
| 97   | <i>PBX2</i>     | -0.80972    |
| 98   | <i>EDN3</i>     | -0.80961    |
| 99   | <i>ERMN</i>     | -0.80952    |
| 100  | <i>EN1</i>      | 0.80884     |

| Rank | Gene                     | Pearson's R |
|------|--------------------------|-------------|
| 101  | <i>KIAA1530</i>          | 0.80869     |
| 102  | <i>PCNA</i>              | -0.80854    |
| 103  | <i>HOXC4;HOXC6;HOXC5</i> | 0.80815     |
| 104  | <i>C19orf6</i>           | 0.80808     |
| 105  | <i>CTDP1</i>             | -0.80797    |
| 106  | <i>MAP7</i>              | -0.80708    |
| 107  | <i>RNF212</i>            | -0.80683    |
| 108  | <i>UGP2</i>              | 0.80669     |
| 109  | <i>BAT2</i>              | 0.80626     |
| 110  | <i>FTH1</i>              | -0.80615    |
| 111  | <i>NSUN5</i>             | -0.80603    |
| 112  | <i>ACTN1</i>             | -0.80561    |
| 113  | <i>RWDD1</i>             | 0.80555     |
| 114  | <i>ATP5D</i>             | 0.80539     |
| 115  | <i>MAP4K4</i>            | 0.80475     |
| 116  | <i>MGST1</i>             | -0.80432    |
| 117  | <i>NUCKS1</i>            | 0.8043      |
| 118  | <i>ADPRHL1</i>           | -0.80421    |
| 119  | <i>ATP11A</i>            | -0.80337    |
| 120  | <i>IQCK</i>              | 0.80307     |
| 121  | <i>SEC14L1</i>           | -0.80244    |
| 122  | <i>KIAA1407</i>          | 0.80221     |
| 123  | <i>FAM98A</i>            | -0.80198    |
| 124  | <i>HNRNPUL2;TTC9C</i>    | 0.8019      |
| 125  | <i>SCRIB</i>             | -0.80156    |
| 126  | <i>SLC29A1</i>           | -0.80153    |
| 127  | <i>GSTP2</i>             | -0.80141    |
| 128  | <i>HNRNPA0</i>           | -0.80124    |
| 129  | <i>FBXL19</i>            | -0.80119    |
| 130  | <i>PHF5A;ACO2</i>        | 0.801       |
| 131  | <i>CENPT</i>             | 0.80095     |
| 132  | <i>HSPB1</i>             | -0.80068    |
| 133  | <i>C14orf119;ACINI</i>   | 0.80065     |
| 134  | <i>USF2</i>              | 0.80037     |
| 135  | <i>TAF15</i>             | 0.80004     |

## References

1. Andersen CL, Jensen JL, Orntoft TF. Normalization of real-time quantitative reverse transcription-PCR data: a model-based variance estimation approach to identify genes suited for normalization, applied to bladder and colon cancer data sets. *Cancer Res* 2004; **64**:5245-50.
2. Livak KJ, Schmittgen TD. Analysis of relative gene expression data using real-time quantitative PCR and the 2(-Delta Delta C(T)) Method. *Methods* 2001; **25**:402-8.
3. Tryka KA, Hao L, Sturcke A, Jin Y, Wang ZY, Ziyabari L, et al. NCBI's Database of Genotypes and Phenotypes: dbGaP. *Nucleic Acids Res* 2014; **42**:D975-9.
4. Cichon S, Schumacher J, Muller DJ, Hurter M, Windemuth C, Strauch K, et al. A genome screen for genes predisposing to bipolar affective disorder detects a new susceptibility locus on 8q. *Hum Mol Genet* 2001; **10**:2933-44.
5. Gonzalez S, Camarillo C, Rodriguez M, Ramirez M, Zavala J, Armas R, et al. A genome-wide linkage scan of bipolar disorder in Latino families identifies susceptibility loci at 8q24 and 14q32. *Am J Med Genet B Neuropsychiatr Genet* 2014; **165b**:479-91.
6. Lekman M, Karlsson R, Graae L, Hossjer O, Kockum I. A significant risk locus on 19q13 for bipolar disorder identified using a combined genome-wide linkage and copy number variation analysis. *BioData Min* 2015; **8**:42.
7. Francks C, Tozzi F, Farmer A, Vincent JB, Rujescu D, St Clair D, et al. Population-based linkage analysis of schizophrenia and bipolar case-control cohorts identifies a potential susceptibility locus on 19q13. *Mol Psychiatry* 2010; **15**:319-25.
8. Georgi B, Craig D, Kember RL, Liu W, Lindquist I, Nasser S, et al. Genomic view of bipolar disorder revealed by whole genome sequencing in a genetic isolate. *PLoS Genet* 2014; **10**:e1004229.
9. Badner JA, Gershon ES. Meta-analysis of whole-genome linkage scans of bipolar disorder and schizophrenia. *Mol Psychiatry* 2002; **7**:405-11.



10. Large-scale genome-wide association analysis of bipolar disorder identifies a new susceptibility locus near ODZ4. *Nat Genet* 2011; **43**:977-83.
11. Clelland CL, Read LL, Panek LJ, Nadrich RH, Bancroft C, Clelland JD. Utilization of never-medicated bipolar disorder patients towards development and validation of a peripheral biomarker profile. *PLoS One* 2013; **8**:e69082.
12. Savitz J, Frank MB, Victor T, Bebak M, Marino JH, Bellgowan PS, et al. Inflammation and neurological disease-related genes are differentially expressed in depressed patients with mood disorders and correlate with morphometric and functional imaging abnormalities. *Brain Behav Immun* 2013; **31**:161-71.

## Supplementary Material

### Methods

#### Real-time quantitative PCR

A few genes shown to be differentially expressed between groups were selected for validation by quantitative real-time PCR using TaqMan<sup>®</sup> predesigned probes and primers (Life Technologies; Carlsbad, CA, USA), as follows: *SNORA65* – Hs03297864\_s1; *PITPNM1* – Hs00907527\_m1; *PBX2* – Hs01901345; *CREG1* – Hs00355412\_m1. Real-time quantitative PCR was also performed to assess the levels of *MED1*, *GTF2A1*, *HSPA1L*, and *TAF15* in the lymphoblastoid cells using the following TaqMan<sup>®</sup> probes (Life Technologies): *MED1* – Hs01062348\_m1; *GTF2A1* – HS01026831\_m1; *HSPA1L* – Hs00271466\_s1; *TAF15* – Hs00185844\_m1; *FKBP5* – Hs01561006\_m1; *TSC22D3* – Hs00608272\_m1; *PER1* – Hs01092603\_m1. Beta-2 microglobulin (*B2M*, Hs00187842) was used as the endogenous control after an initial screening performed with four other genes (*ACTB*, *HPRT1*, *PGK1* and *GAPDH*) and analyzed with NormFinder<sup>1</sup>. Briefly, 600 ng of total RNA were reverse-transcribed to complementary DNA (cDNA) with the High Capacity cDNA Reverse Transcription Kit (Life Technologies) and used as templates in PCR reactions performed with the TaqMan<sup>®</sup> Gene Expression Master Mix (Life Technologies), according to manufacturer's instructions. Reactions were run in triplicate on a QuantStudio<sup>®</sup> 7 Flex Real-Time PCR System (Life Technologies) and analyzed by the delta delta Ct method<sup>2</sup>.

#### Methylome profiling

Genome-wide methylation data from the Infinium HumanMethylation 450 BeadChip array (Illumina) were processed using the GenomeStudio V2011.1 software, where quality control checks, normalization (controls), and background adjustment were performed. The control group was used as the reference for the differential methylation analysis, in which Illumina custom was employed as the error model and false discovery rate was computed. Probes with a detection *p*-value > 0.01, as well as those located on the X or

Y chromosomes or those containing single nucleotide polymorphisms, were removed from the analysis, resulting in 385 248 probes.

### **Database and literature mining**

Database and literature mining was performed to check for evidence of associations between the risk genes identified in our analysis and previous studies in BD patients. Specifically: 1) we checked whether the risk genes are located in *loci* previously linked to BD in linkage studies; 2) we looked for previously reported associations of the risk genes with BD in genome-wide association studies (GWAS) by mining the database for Genotypes and Phenotypes (dbGaP; [ncbi.nlm.nih.gov/gap/](http://ncbi.nlm.nih.gov/gap/))<sup>3</sup>; and 3) we looked for differences in the expression of those genes in genome-wide expression studies (GWES) comparing BD patients and controls using the Gene Expression Omnibus (GEO) database ([ncbi.nlm.nih.gov/geo/](http://ncbi.nlm.nih.gov/geo/)), followed by analysis on the GEO2R ([ncbi.nlm.nih.gov/geo/geo2r/](http://ncbi.nlm.nih.gov/geo/geo2r/)).

## Results

### Database and literature mining

#### *Linkage studies*

The region encompassing ‘risk gene’ *SLC45A4*, 8q24, is among the susceptibility *loci* reported for BD with a LOD score of 3.62 in a cohort of 75 BD families<sup>4</sup>. This association was later replicated in a sample of 3 757 individuals of Latino ancestry<sup>5</sup>. Likewise, the region 19q13, which includes the risk genes *CLPTM1* (19q13.32), *CLASRP* (19q13.32), and *ZNF234* (19q13.31) identified in our analysis, has also been linked to BD susceptibility<sup>6, 7</sup> and is proposed to harbor several putative candidate risk genes for BD<sup>6</sup>. Finally, the region 7q21, which includes the risk gene *MAGI2*, was associated with bipolar spectrum disorder in a linkage analysis<sup>8</sup> and also showed significant evidence for linkage with BD in a meta-analysis<sup>9</sup>.

#### *GWAS*

The only risk gene previously associated with BD in a GWAS study is *SLC45A4*<sup>10</sup>, which was identified in the analysis of 7 481 BD patients and 9 250 healthy controls. Specifically, the association with BD was found at an intergenic single nucleotide polymorphism (SNP) (rs782729) located between the *SLC45A4* and *GPR2* genes (location – 8: 142 300 315;  $p = 9.00 \times 10^{-6}$ ).

#### *GWES*

Microarray expression profiles were extracted from the publicly available GEO NCBI database, and the search criteria included the Medical Subject Heading (MeSH) term for “bipolar disorder” and “*Homo sapiens*”. After analysis on the GEO2R tool, we compared our list of risk genes with the differentially expressed genes in each of the datasets found. The selected datasets were GSE46449, which compared expression in leukocytes from first-episode (n=3) and currently medicated BD patients (n = 26) with matched healthy controls (n=25)<sup>11</sup>, and GSE39653, which compared expression in PBMCs from 24 adult healthy controls and 8 adult patients with BD<sup>12</sup>. Among our list of risk genes, differences in the

expression of *NUCKS1*, *ZNF641*, *PRR14*, *SAFB2*, *CLPTM1*, *FBXW11*, *ALDH6A1*, *CLASRP*, *TAF15*, *ARID4B*, *SUZ12*, *SLC45A4*, *DNAJC7*, *NLK*, *HUWE1*, *MTF2*, *ZNF234*, and *THOC2* have been reported in peripheral blood cells between BD patients and controls<sup>11, 12</sup>.



**Figure S1.** Validation of gene expression microarray results with real-time quantitative PCR. Results from selected risk genes were validated by real-time quantitative PCR using TaqMan® probes and primers: A) *SNORA65*; B) *PIPTNMI*; C) *PBX2*; D) *CREG1*. Expression levels of the target genes were normalized to the expression of beta-2 microglobulin levels, and relative quantification (RQ) levels were determined by the delta delta Ct method<sup>2</sup>. \* $p < 0.05$ ; \*\* $p < 0.01$  (one-way ANOVA followed by Tukey post-hoc test for results from A-C, and Kruskal-Wallis followed by Mann-Whitney tests for results from D).



**Figure S2.** Cell viability after treatment of lymphoblastoid cells from controls ( $n = 6$ ) with different doses of 5-Aza-2'-deoxycytidine (5-AzadC) for 96 hours. One-way ANOVA  $F(5,30) = 1.154$ ,  $p = 0.354$ .



**Figure S3.** Cell viability after treatment of lymphoblastoid cells from controls ( $n = 6$ ) with  $10^{-7}$  M dexamethasone for 4 or 48 hours. None of these treatment conditions significantly reduced viability as assessed by MTT reduction. Comparisons between vehicle and dexamethasone were made with Mann-Whitney tests considering Bonferroni-corrected  $p$ -value  $< .025$  as significant: 4 h –  $p = 0.394$ ; 48 h –  $p = 0.066$ ).



**Table S1.** Differentially expressed genes between controls and unaffected offspring

| <b>Rank</b> | <b>Gene symbol</b>  | <b>Probe ID</b> | <b>Mean Controls</b> | <b>Mean Offspring</b> | <b>-log<sub>10</sub>(p-value)</b> |
|-------------|---------------------|-----------------|----------------------|-----------------------|-----------------------------------|
| 1           | <i>NUCKS1</i>       | 4880445         | 4877.38              | 2923.15               | 7.625                             |
| 2           | <i>PPARBP</i>       | 1070195         | 647.10               | 429.08                | 7.165                             |
| 3           | <i>XPR1</i>         | 160441          | 50.58                | 76.23                 | 7.007                             |
| 4           | <i>TAF15</i>        | 10176           | 3835.98              | 1351.73               | 6.939                             |
| 5           | <i>LSM14B</i>       | 2360754         | 22.15                | -1.02                 | 6.905                             |
| 6           | <i>ATP8B2</i>       | 6960168         | 977.42               | 427.35                | 6.764                             |
| 7           | <i>ATP6V1F</i>      | 3870630         | 2322.43              | 3241.37               | 6.602                             |
| 8           | <i>LOC644774</i>    | 6580544         | 852.35               | 1548.52               | 6.508                             |
| 9           | <i>HINT3</i>        | 2140279         | 661.07               | 2025.78               | 6.487                             |
| 10          | <i>IL11RA</i>       | 2760148         | 636.62               | 288.23                | 6.450                             |
| 11          | <i>LOC728649</i>    | 4610315         | 27.70                | 165.85                | 6.429                             |
| 12          | <i>GATAD2A</i>      | 1570373         | 2191.88              | 1542.20               | 6.356                             |
| 13          | <i>NIPSNAP3A</i>    | 2490100         | 178.78               | 346.08                | 6.334                             |
| 14          | <i>THOC2</i>        | 2490397         | 966.20               | 565.00                | 6.274                             |
| 15          | <i>MTF2</i>         | 2760255         | 790.62               | 560.70                | 6.201                             |
| 16          | <i>SFRS16</i>       | 2510722         | 195.30               | 71.40                 | 6.068                             |
| 17          | <i>PGK1</i>         | 6110400         | 3213.13              | 4315.75               | 6.023                             |
| 18          | <i>ARID4B</i>       | 2470603         | 586.08               | 272.12                | 6.007                             |
| 19          | <i>CMTM6</i>        | 1470520         | 1911.82              | 2946.80               | 5.976                             |
| 20          | <i>LOC100131360</i> | 1940025         | 164.93               | 81.88                 | 5.895                             |
| 21          | <i>EPC1</i>         | 6380008         | 266.33               | 105.97                | 5.885                             |
| 22          | <i>SAFB2</i>        | 2850091         | 1492.55              | 1058.78               | 5.791                             |
| 23          | <i>PBX2</i>         | 5820681         | 446.10               | 224.48                | 5.694                             |
| 24          | <i>FASTK</i>        | 770687          | 912.35               | 602.32                | 5.673                             |
| 25          | <i>HGS</i>          | 5130253         | 1545.93              | 1132.97               | 5.666                             |
| 26          | <i>TECPR1</i>       | 5810196         | 1139.43              | 591.27                | 5.620                             |
| 27          | <i>HIGD1A</i>       | 7100164         | 725.12               | 936.85                | 5.520                             |
| 28          | <i>DHX37</i>        | 4260142         | 688.78               | 489.52                | 5.403                             |
| 29          | <i>RPS6KA3</i>      | 2260133         | 381.35               | 192.22                | 5.320                             |
| 30          | <i>ZNF364</i>       | 7380382         | 1070.67              | 823.08                | 5.296                             |
| 31          | <i>UBE2E1</i>       | 4050070         | 93.70                | 50.07                 | 5.289                             |
| 32          | <i>ZNF641</i>       | 6650747         | 104.62               | 54.05                 | 5.258                             |
| 33          | <i>C10ORF26</i>     | 150678          | 142.58               | 207.30                | 5.248                             |
| 34          | <i>KIAA1530</i>     | 5910026         | 333.87               | 183.22                | 5.218                             |
| 35          | <i>SCAP</i>         | 3140382         | 1006.92              | 774.30                | 5.194                             |
| 36          | <i>FBXW11</i>       | 3460711         | 820.33               | 498.53                | 5.192                             |
| 37          | <i>HUWE1</i>        | 6980332         | 144.53               | 97.85                 | 5.181                             |
| 38          | <i>ARID4B</i>       | 6590722         | 383.28               | 219.60                | 5.166                             |
| 39          | <i>TOP3A</i>        | 3890553         | 311.82               | 200.15                | 5.165                             |
| 40          | <i>FBXW11</i>       | 510253          | 113.82               | 61.40                 | 5.148                             |

|    |                     |         |         |         |       |
|----|---------------------|---------|---------|---------|-------|
| 41 | <i>LENG8</i>        | 2000142 | 82.68   | 39.95   | 5.103 |
| 42 | <i>SPATA6</i>       | 3450193 | 20.63   | 53.63   | 5.052 |
| 43 | <i>DDX17</i>        | 7000259 | 399.13  | 188.72  | 5.040 |
| 44 | <i>SUZ12</i>        | 4920619 | 3164.18 | 2139.22 | 5.036 |
| 45 | <i>SAFB2</i>        | 7050670 | 1591.58 | 1101.40 | 5.001 |
| 46 | <i>IL7R</i>         | 3830349 | 3297.30 | 1441.23 | 4.994 |
| 47 | <i>DNAJC7</i>       | 3290037 | 552.73  | 351.83  | 4.969 |
| 48 | <i>HIPK2</i>        | 10332   | 553.87  | 324.13  | 4.946 |
| 49 | <i>FANCD2</i>       | 2690240 | 247.00  | 124.27  | 4.930 |
| 50 | <i>GMPR2</i>        | 2490600 | 825.77  | 1051.03 | 4.889 |
| 51 | <i>CIORF43</i>      | 4890113 | 186.48  | 312.55  | 4.886 |
| 52 | <i>SERPINB8</i>     | 3400672 | 139.58  | 265.42  | 4.879 |
| 53 | <i>ZNF275</i>       | 3360008 | 392.43  | 258.57  | 4.875 |
| 54 | <i>NFATC2IP</i>     | 6520201 | 1067.35 | 733.93  | 4.869 |
| 55 | <i>CHMP2A</i>       | 3290181 | 150.65  | 228.52  | 4.869 |
| 56 | <i>ANO9</i>         | 5720373 | 27.58   | 4.05    | 4.848 |
| 57 | <i>NEURL4</i>       | 1990292 | 78.98   | 36.20   | 4.838 |
| 58 | <i>BRIP1</i>        | 5960730 | 8.03    | 31.67   | 4.829 |
| 59 | <i>WDR73</i>        | 4210332 | 110.07  | 65.82   | 4.829 |
| 60 | <i>BRE</i>          | 1400450 | 372.30  | 451.30  | 4.794 |
| 61 | <i>TK2</i>          | 5690053 | 51.30   | 96.08   | 4.789 |
| 62 | <i>PIAS1</i>        | 1820019 | 567.03  | 420.55  | 4.780 |
| 63 | <i>PCNT</i>         | 1510014 | 710.85  | 463.02  | 4.774 |
| 64 | <i>PUS1</i>         | 60092   | 1386.98 | 1058.78 | 4.769 |
| 65 | <i>ALDH6A1</i>      | 7100274 | 116.72  | 66.72   | 4.762 |
| 66 | <i>COG5</i>         | 1430577 | 203.15  | 98.00   | 4.761 |
| 67 | <i>FAM32A</i>       | 3780440 | 842.07  | 1060.72 | 4.753 |
| 68 | <i>LOC100129086</i> | 4760397 | 331.75  | 457.12  | 4.749 |
| 69 | <i>ATP6V0E1</i>     | 2320110 | 2541.35 | 3415.73 | 4.744 |
| 70 | <i>ZNF767</i>       | 5090544 | 75.00   | 45.78   | 4.734 |
| 71 | <i>CRADD</i>        | 1990291 | 199.03  | 259.50  | 4.714 |
| 72 | <i>TCERG1</i>       | 4490600 | 41.03   | 6.92    | 4.709 |
| 73 | <i>PXMP3</i>        | 1090288 | 288.30  | 428.72  | 4.704 |
| 74 | <i>HNRPDL</i>       | 6860678 | 531.47  | 332.23  | 4.704 |
| 75 | <i>MARCH3</i>       | 780544  | 441.23  | 300.97  | 4.678 |
| 76 | <i>LOC646347</i>    | 7510209 | 782.08  | 1019.82 | 4.670 |
| 77 | <i>SNORA65</i>      | 2640019 | 9.20    | 72.53   | 4.669 |
| 78 | <i>MRII</i>         | 4860402 | 97.15   | 41.12   | 4.637 |
| 79 | <i>LYPLA1</i>       | 70300   | 267.13  | 399.48  | 4.623 |
| 80 | <i>ACAP1</i>        | 7210682 | 1615.35 | 1036.08 | 4.598 |
| 81 | <i>PITPNM1</i>      | 6960215 | 1274.90 | 635.28  | 4.591 |
| 82 | <i>LOC100132707</i> | 6580500 | 75.28   | 32.83   | 4.580 |
| 83 | <i>RHEB</i>         | 2450139 | 1227.22 | 1639.20 | 4.569 |

|     |                     |         |         |         |       |
|-----|---------------------|---------|---------|---------|-------|
| 84  | <i>LOC645969</i>    | 2750441 | 173.27  | 285.58  | 4.555 |
| 85  | <i>GNL3L</i>        | 5900746 | 835.20  | 525.42  | 4.542 |
| 86  | <i>PRR14</i>        | 7570711 | 1731.32 | 1435.67 | 4.525 |
| 87  | <i>AZII</i>         | 3390605 | 211.15  | 132.97  | 4.518 |
| 88  | <i>TNFSF13</i>      | 2140040 | 51.55   | 130.52  | 4.498 |
| 89  | <i>ZNF234</i>       | 5720072 | 80.88   | 44.17   | 4.498 |
| 90  | <i>SEC22C</i>       | 7000386 | 120.37  | 179.15  | 4.443 |
| 91  | <i>TATDN3</i>       | 6020368 | 139.93  | 189.23  | 4.442 |
| 92  | <i>MTA2</i>         | 2000204 | 291.53  | 194.07  | 4.430 |
| 93  | <i>SERP1</i>        | 1770541 | 844.45  | 1182.87 | 4.429 |
| 94  | <i>PRPS1</i>        | 4780521 | 1013.02 | 671.53  | 4.424 |
| 95  | <i>ST3GAL1</i>      | 1300601 | 770.65  | 440.25  | 4.423 |
| 96  | <i>D2HGDH</i>       | 2710129 | 276.40  | 133.62  | 4.401 |
| 97  | <i>LOC728666</i>    | 1110487 | 390.08  | 626.28  | 4.399 |
| 98  | <i>EDC4</i>         | 6960037 | 767.75  | 565.67  | 4.362 |
| 99  | <i>UPF2</i>         | 5390603 | 389.77  | 233.18  | 4.349 |
| 100 | <i>STMN3</i>        | 4780224 | 2431.45 | 1385.75 | 4.346 |
| 101 | <i>HSPA1L</i>       | 6280471 | 352.75  | 207.25  | 4.341 |
| 102 | <i>CD36</i>         | 1010592 | 1330.25 | 2710.03 | 4.332 |
| 103 | <i>EZR</i>          | 2100612 | 8308.13 | 6158.52 | 4.318 |
| 104 | <i>CLPTM1</i>       | 770168  | 447.03  | 293.50  | 4.291 |
| 105 | <i>PLA2G4B</i>      | 2350722 | 857.63  | 484.65  | 4.290 |
| 106 | <i>RNF217</i>       | 6380048 | 9.48    | 32.20   | 4.286 |
| 107 | <i>TBC1D10C</i>     | 5050603 | 2504.80 | 1604.35 | 4.276 |
| 108 | <i>SCNM1</i>        | 6350070 | 256.05  | 352.42  | 4.274 |
| 109 | <i>C9ORF72</i>      | 3990411 | 110.28  | 261.98  | 4.262 |
| 110 | <i>GATAD2B</i>      | 2370576 | 365.52  | 211.90  | 4.259 |
| 111 | <i>ZNF526</i>       | 2750040 | 75.48   | 41.32   | 4.251 |
| 112 | <i>LSM10</i>        | 160255  | 685.98  | 927.23  | 4.244 |
| 113 | <i>LOC100128510</i> | 5670431 | 310.03  | 149.52  | 4.244 |
| 114 | <i>TTC14</i>        | 7000240 | 313.98  | 202.08  | 4.243 |
| 115 | <i>ZMYND11</i>      | 1190626 | 2634.08 | 1754.93 | 4.239 |
| 116 | <i>MTMR14</i>       | 2470068 | 631.07  | 863.43  | 4.232 |
| 117 | <i>C17ORF41</i>     | 6290070 | 38.35   | 11.93   | 4.230 |
| 118 | <i>TAF5L</i>        | 2320292 | 131.37  | 55.27   | 4.226 |
| 119 | <i>SMS</i>          | 4490341 | 979.95  | 1251.57 | 4.213 |
| 120 | <i>CNIH</i>         | 3120767 | 410.55  | 598.47  | 4.198 |
| 121 | <i>HS.439031</i>    | 2070445 | 27.83   | 12.73   | 4.196 |
| 122 | <i>CCS</i>          | 2750630 | 75.03   | 43.22   | 4.195 |
| 123 | <i>NP1P</i>         | 1070070 | 503.42  | 303.78  | 4.194 |
| 124 | <i>TAF1C</i>        | 6380131 | 1390.53 | 811.35  | 4.179 |
| 125 | <i>LOC440731</i>    | 4010270 | 119.50  | 224.80  | 4.173 |
| 126 | <i>GTF2A1</i>       | 5910133 | 68.88   | 44.35   | 4.171 |

|     |                   |         |         |         |       |
|-----|-------------------|---------|---------|---------|-------|
| 127 | <i>EML3</i>       | 3400397 | 1663.55 | 1186.53 | 4.167 |
| 128 | <i>NCRNA00120</i> | 7160730 | 7.82    | 31.70   | 4.166 |

---

**Table S2.** Differentially expressed genes between controls and BD patients

| <b>Rank</b> | <b>Gene symbol</b>  | <b>Probe ID</b> | <b>Mean Controls</b> | <b>Mean BD</b> | <b>-log10(p-value)</b> |
|-------------|---------------------|-----------------|----------------------|----------------|------------------------|
| 1           | <i>PAK1IP1</i>      | 1990575         | 199.27               | 137.17         | 6.914                  |
| 2           | <i>UBQLN2</i>       | 5560482         | 1633.40              | 1082.67        | 6.560                  |
| 3           | <i>NUCKS1</i>       | 4880445         | 4877.38              | 3327.17        | 6.269                  |
| 4           | <i>ATP8B2</i>       | 6960168         | 977.42               | 488.68         | 6.092                  |
| 5           | <i>PBX2</i>         | 5820681         | 446.10               | 215.63         | 5.908                  |
| 6           | <i>HINT3</i>        | 2140279         | 661.07               | 1863.58        | 5.780                  |
| 7           | <i>PPARBP</i>       | 1070195         | 647.10               | 477.17         | 5.747                  |
| 8           | <i>ZNF641</i>       | 6650747         | 104.62               | 49.32          | 5.733                  |
| 9           | <i>LOC728649</i>    | 4610315         | 27.70                | 148.53         | 5.685                  |
| 10          | <i>LOC100131360</i> | 1940025         | 164.93               | 85.22          | 5.672                  |
| 11          | <i>ALDH6A1</i>      | 7100274         | 116.72               | 57.60          | 5.626                  |
| 12          | <i>FBXW11</i>       | 3460711         | 820.33               | 475.82         | 5.551                  |
| 13          | <i>SNORA65</i>      | 2640019         | 9.20                 | 83.18          | 5.461                  |
| 14          | <i>COG5</i>         | 1430577         | 203.15               | 83.68          | 5.413                  |
| 15          | <i>SAFB2</i>        | 2850091         | 1492.55              | 1096.37        | 5.307                  |
| 16          | <i>MTP18</i>        | 6450184         | 7.60                 | 34.00          | 5.302                  |
| 17          | <i>GTF2A1</i>       | 5910133         | 68.88                | 38.25          | 5.259                  |
| 18          | <i>EEF2</i>         | 1580292         | 15407.50             | 11164.07       | 5.230                  |
| 19          | <i>TAF15</i>        | 10176           | 3835.98              | 2018.23        | 5.209                  |
| 20          | <i>LSM14B</i>       | 2360754         | 22.15                | 5.20           | 5.178                  |
| 21          | <i>CARHSP1</i>      | 1230348         | 1011.63              | 561.02         | 5.172                  |
| 22          | <i>ZNF319</i>       | 3180315         | 527.62               | 385.93         | 5.144                  |
| 23          | <i>MTF2</i>         | 2760255         | 790.62               | 603.77         | 5.087                  |
| 24          | <i>PITPNM1</i>      | 6960215         | 1274.90              | 569.78         | 5.077                  |
| 25          | <i>FASTK</i>        | 770687          | 912.35               | 635.83         | 5.072                  |
| 26          | <i>DNAJC7</i>       | 3290037         | 552.73               | 349.10         | 5.037                  |
| 27          | <i>CLPTM1</i>       | 770168          | 447.03               | 269.08         | 5.010                  |
| 28          | <i>UBE2E1</i>       | 4050070         | 93.70                | 52.95          | 4.939                  |
| 29          | <i>HS.573106</i>    | 4390451         | 10.30                | -4.33          | 4.932                  |
| 30          | <i>FBXW11</i>       | 510253          | 113.82               | 64.63          | 4.826                  |
| 31          | <i>ZNF234</i>       | 5720072         | 80.88                | 41.70          | 4.815                  |
| 32          | <i>RNY4</i>         | 1070079         | 80.03                | 347.28         | 4.794                  |
| 33          | <i>LOC100129509</i> | 6400343         | 11.10                | -4.87          | 4.757                  |
| 34          | <i>ALKBH5</i>       | 1400209         | 6750.58              | 5578.07        | 4.735                  |
| 35          | <i>APIM1</i>        | 2190241         | 1817.53              | 1468.32        | 4.714                  |
| 36          | <i>MXRA7</i>        | 1820181         | 20.67                | 0.67           | 4.713                  |
| 37          | <i>THOC2</i>        | 2490397         | 966.20               | 668.52         | 4.696                  |
| 38          | <i>PRR14</i>        | 7570711         | 1731.32              | 1428.45        | 4.642                  |
| 39          | <i>SAFB2</i>        | 7050670         | 1591.58              | 1138.45        | 4.611                  |
| 40          | <i>HSPA1L</i>       | 6280471         | 352.75               | 199.57         | 4.586                  |

|    |                 |         |         |         |       |
|----|-----------------|---------|---------|---------|-------|
| 41 | <i>SUZ12</i>    | 4920619 | 3164.18 | 2236.62 | 4.541 |
| 42 | <i>PXMP3</i>    | 1090288 | 288.30  | 422.65  | 4.490 |
| 43 | <i>SFRS16</i>   | 2510722 | 195.30  | 104.02  | 4.483 |
| 44 | <i>C6ORF204</i> | 2000564 | 204.80  | 94.43   | 4.457 |
| 45 | <i>HUWE1</i>    | 6980332 | 144.53  | 104.25  | 4.449 |
| 46 | <i>ALDH6A1</i>  | 5820373 | 226.37  | 126.45  | 4.411 |
| 47 | <i>ATP6V1F</i>  | 3870630 | 2322.43 | 2929.05 | 4.410 |
| 48 | <i>IL7R</i>     | 3830349 | 3297.30 | 1665.37 | 4.365 |
| 49 | <i>ZC3H4</i>    | 5820608 | 1465.00 | 1010.78 | 4.339 |
| 50 | <i>SNORD101</i> | 3400139 | 0.55    | 28.83   | 4.331 |
| 51 | <i>SMURF1</i>   | 840598  | 32.38   | 68.37   | 4.303 |
| 52 | <i>LSM5</i>     | 6650133 | 324.40  | 229.03  | 4.217 |
| 53 | <i>NDUFC1</i>   | 1110575 | 1085.17 | 886.83  | 4.214 |
| 54 | <i>C2ORF27B</i> | 2120446 | -5.03   | 8.32    | 4.188 |
| 55 | <i>MIER3</i>    | 6100092 | -4.88   | 10.72   | 4.167 |
| 56 | <i>ARID4B</i>   | 2470603 | 586.08  | 351.70  | 3.487 |

---

**Table S3.** Differentially expressed genes between BD patients and unaffected offspring

| <b>Rank</b> | <b>Gene symbol</b>  | <b>Probe ID</b> | <b>Mean Offspring</b> | <b>Mean BD</b> | <b>-log<sub>10</sub>(<i>p</i>-value)</b> |
|-------------|---------------------|-----------------|-----------------------|----------------|------------------------------------------|
| 1           | <i>NIPSNAP3A</i>    | 2490100         | 346.08                | 214.80         | 5.028                                    |
| 2           | <i>LOC648226</i>    | 4060452         | 2.18                  | 19.97          | 4.957                                    |
| 3           | <i>LOC23117</i>     | 2850400         | 2268.88               | 3798.75        | 4.614                                    |
| 4           | <i>TNPO2</i>        | 2450382         | 559.57                | 720.15         | 4.601                                    |
| 5           | <i>GPR177</i>       | 6130136         | 159.13                | 50.53          | 4.520                                    |
| 6           | <i>LOC100130138</i> | 4890653         | 8.18                  | 27.77          | 4.497                                    |
| 7           | <i>LOC613037</i>    | 2760189         | 351.17                | 533.33         | 4.401                                    |
| 8           | <i>LRP3</i>         | 730458          | 457.68                | 191.43         | 4.397                                    |
| 9           | <i>LOC729978</i>    | 6980601         | 2568.68               | 4299.57        | 4.389                                    |
| 10          | <i>S100Z</i>        | 5870338         | 187.77                | 90.42          | 4.290                                    |
| 11          | <i>FLJ40113</i>     | 2320603         | -9.07                 | 6.02           | 4.286                                    |
| 12          | <i>LRP5L</i>        | 540403          | 141.42                | 276.77         | 4.269                                    |

**Table S4.** Differentially methylated probes between controls and unaffected offspring

| Rank | Index  | Target D   | Controls<br>AVG Beta | Offspring<br>AVG Beta | Delta Beta | Illumina<br>Gene Annotation |
|------|--------|------------|----------------------|-----------------------|------------|-----------------------------|
| 1    | 10788  | cg05593887 | 0.17765              | 0.82772               | 0.65007    | <i>MAGI2</i>                |
| 2    | 439894 | cg25099095 | 0.71343              | 0.18537               | -0.52806   |                             |
| 3    | 232939 | cg12515659 | 0.20226              | 0.6958                | 0.49354    | <i>FAM134B</i>              |
| 4    | 244024 | cg13232075 | 0.26133              | 0.73814               | 0.4768     |                             |
| 5    | 164958 | cg08522473 | 0.46799              | 0.92582               | 0.45783    | <i>TAGLN3</i>               |
| 6    | 485539 | rs2208123  | 0.63222              | 0.18306               | -0.44916   |                             |
| 7    | 420903 | cg23943944 | 0.73918              | 0.2918                | -0.44738   |                             |
| 8    | 341341 | cg18816122 | 0.10999              | 0.54603               | 0.43604    | <i>PLEKHG4B</i>             |
| 9    | 418678 | cg23804921 | 0.66943              | 0.23467               | -0.43475   |                             |
| 10   | 125395 | cg06417478 | 0.49136              | 0.06335               | -0.42801   | <i>HOOK2</i>                |
| 11   | 825    | cg00033213 | 0.76162              | 0.34312               | -0.4185    | <i>TOP1MT</i>               |
| 12   | 140429 | cg07179329 | 0.81228              | 0.40225               | -0.41004   | <i>CDH13</i>                |
| 13   | 485542 | rs2468330  | 0.40563              | 0.80961               | 0.40398    |                             |
| 14   | 357637 | cg19848924 | 0.8485               | 0.44559               | -0.40292   |                             |
| 15   | 214900 | cg11418607 | 0.20225              | 0.59598               | 0.39373    |                             |
| 16   | 485572 | rs9292570  | 0.47504              | 0.8672                | 0.39216    |                             |
| 17   | 1113   | cg00045070 | 0.2168               | 0.59676               | 0.37996    | <i>PCSK9</i>                |
| 18   | 275290 | cg14795227 | 0.66052              | 0.28297               | -0.37755   |                             |
| 19   | 145092 | cg07437919 | 0.52561              | 0.14916               | -0.37645   | <i>SLC45A4</i>              |
| 20   | 236587 | cg12743416 | 0.43029              | 0.05617               | -0.37412   | <i>TRIM24</i>               |
| 21   | 178385 | cg09289202 | 0.32759              | 0.70086               | 0.37327    | <i>STK25</i>                |
| 22   | 151617 | cg07791065 | 0.48947              | 0.85983               | 0.37036    |                             |
| 23   | 297138 | cg16147201 | 0.70586              | 0.33572               | -0.37014   |                             |
| 24   | 59125  | cg02907150 | 0.42158              | 0.78546               | 0.36387    | <i>PCNX</i>                 |
| 25   | 27242  | cg01303420 | 0.73203              | 0.37015               | -0.36188   | <i>C3orf55</i>              |
| 26   | 214578 | cg11401796 | 0.84504              | 0.49041               | -0.35463   | <i>C21orf70</i>             |
| 27   | 162978 | cg08412936 | 0.74738              | 0.40151               | -0.34588   | <i>PSORS1C1</i>             |
| 28   | 163134 | cg08422420 | 0.12593              | 0.46952               | 0.34359    | <i>SDHAP3</i>               |
| 29   | 190626 | cg10000195 | 0.83652              | 0.49385               | -0.34267   |                             |
| 30   | 220895 | cg11792281 | 0.54053              | 0.19843               | -0.3421    | <i>NLK</i>                  |
| 31   | 424315 | cg24136292 | 0.19632              | 0.53542               | 0.33909    | <i>INSC</i>                 |
| 32   | 154968 | cg07973095 | 0.21551              | 0.55264               | 0.33713    | <i>DECR2</i>                |
| 33   | 461936 | cg26472636 | 0.18363              | 0.52064               | 0.33701    | <i>SDHAP3</i>               |
| 34   | 328253 | cg18030105 | 0.6985               | 0.36216               | -0.33634   | <i>ZNF195</i>               |
| 35   | 157273 | cg08104845 | 0.70519              | 0.36939               | -0.3358    | <i>GLUL</i>                 |
| 36   | 288040 | cg15600437 | 0.87072              | 0.53831               | -0.3324    | <i>MFAP2</i>                |
| 37   | 182703 | cg09533869 | 0.12189              | 0.45421               | 0.33232    | <i>PGCP</i>                 |
| 38   | 169447 | cg08778598 | 0.15171              | 0.4837                | 0.33199    | <i>SDHAP3</i>               |
| 39   | 404358 | cg22926869 | 0.6972               | 0.36743               | -0.32977   | <i>HHLA2</i>                |



|    |        |            |         |         |          |                                        |
|----|--------|------------|---------|---------|----------|----------------------------------------|
| 40 | 300021 | cg16316162 | 0.03761 | 0.36569 | 0.32808  | <i>NAPRT1</i>                          |
| 41 | 377036 | cg21117559 | 0.66503 | 0.33811 | -0.32692 | <i>STARD13</i>                         |
| 42 | 376323 | cg21070081 | 0.51683 | 0.84299 | 0.32615  |                                        |
| 43 | 223895 | cg11957130 | 0.61246 | 0.28831 | -0.32415 | <i>ATXN7L1</i>                         |
| 44 | 246480 | cg13379757 | 0.78811 | 0.46513 | -0.32298 |                                        |
| 45 | 452582 | cg25929399 | 0.19389 | 0.51681 | 0.32292  | <i>KRT38</i>                           |
| 46 | 192367 | cg10098373 | 0.77258 | 0.45028 | -0.32229 | <i>CPT1A</i>                           |
| 47 | 485554 | rs5926356  | 0.35218 | 0.67312 | 0.32094  |                                        |
| 48 | 479924 | cg27521571 | 0.82631 | 0.50634 | -0.31997 | <i>COMT</i>                            |
| 49 | 218975 | cg11680857 | 0.69479 | 0.37499 | -0.3198  | <i>LCE2D</i>                           |
| 50 | 302831 | cg16471877 | 0.6782  | 0.35857 | -0.31963 | <i>COQ3</i>                            |
| 51 | 151367 | cg07777042 | 0.85598 | 0.53782 | -0.31816 |                                        |
| 52 | 282760 | cg15251140 | 0.64789 | 0.33263 | -0.31526 |                                        |
| 53 | 420129 | cg23899408 | 0.47816 | 0.16322 | -0.31494 | <i>HOOK2</i>                           |
| 54 | 389523 | cg21931717 | 0.08616 | 0.39962 | 0.31345  | <i>SDHAP3</i>                          |
| 55 | 52721  | cg02587993 | 0.88235 | 0.56971 | -0.31264 |                                        |
| 56 | 321732 | cg17605604 | 0.60023 | 0.28846 | -0.31177 | <i>C5orf30</i>                         |
| 57 | 87981  | cg04383836 | 0.64893 | 0.33766 | -0.31127 | <i>USP43</i>                           |
| 58 | 28217  | cg01356752 | 0.83381 | 0.52285 | -0.31096 |                                        |
| 59 | 237381 | cg12798564 | 0.7643  | 0.45567 | -0.30864 |                                        |
| 60 | 338890 | cg18669823 | 0.62958 | 0.32139 | -0.30819 |                                        |
| 61 | 430609 | cg24534774 | 0.26134 | 0.56927 | 0.30793  |                                        |
| 62 | 485521 | rs10936224 | 0.64588 | 0.33836 | -0.30751 |                                        |
| 63 | 485534 | rs1941955  | 0.69993 | 0.39409 | -0.30584 |                                        |
| 64 | 301482 | cg16398051 | 0.77396 | 0.46897 | -0.30499 | <i>ADAMTS17</i>                        |
| 65 | 437392 | cg24937727 | 0.18563 | 0.49058 | 0.30495  | <i>RGL3</i>                            |
| 66 | 1158   | cg00047185 | 0.76042 | 0.45612 | -0.3043  | <i>MIR526B</i>                         |
| 67 | 167786 | cg08683088 | 0.72006 | 0.41583 | -0.30424 | <i>ELOVL2</i>                          |
| 68 | 355076 | cg19707653 | 0.7376  | 0.4353  | -0.3023  | <i>KIAA1671</i>                        |
| 69 | 74862  | cg03706056 | 0.23804 | 0.54032 | 0.30228  | <i>SETD4</i>                           |
| 70 | 199608 | cg10508111 | 0.8335  | 0.53137 | -0.30212 | <i>PFKM</i>                            |
| 71 | 28700  | cg01381374 | 0.60786 | 0.30602 | -0.30184 |                                        |
| 72 | 100886 | cg05059349 | 0.24652 | 0.54792 | 0.3014   |                                        |
| 73 | 108689 | cg05477582 | 0.79757 | 0.49626 | -0.30131 | <i>CMTM1</i>                           |
| 74 | 383609 | cg21544585 | 0.80007 | 0.49928 | -0.30079 | <i>TMEM155;</i><br><i>LOC100192379</i> |
| 75 | 263104 | cg14179288 | 0.5044  | 0.80462 | 0.30022  | <i>TLE4</i>                            |

**Table S5.** Differentially methylated probes between controls and BD patients

| <b>Rank</b> | <b>Index</b> | <b>Target ID</b> | <b>Controls<br/>AVG Beta</b> | <b>BD AVG<br/>Beta</b> | <b>Delta<br/>Beta</b> | <b>Illumina<br/>Gene Annotation</b> |
|-------------|--------------|------------------|------------------------------|------------------------|-----------------------|-------------------------------------|
| 1           | 348332       | cg19285525       | 0.20847                      | 0.68924                | 0.48078               | <i>RBMS1</i>                        |
| 2           | 244024       | cg13232075       | 0.26133                      | 0.74139                | 0.48005               |                                     |
| 3           | 448561       | cg25649515       | 0.44069                      | 0.91658                | 0.47589               |                                     |
| 4           | 110788       | cg05593887       | 0.17765                      | 0.63184                | 0.45419               | <i>MAGI2</i>                        |
| 5           | 383107       | cg21514997       | 0.15867                      | 0.5992                 | 0.44054               | <i>CCDC148</i>                      |
| 6           | 125395       | cg06417478       | 0.49136                      | 0.05731                | -0.43405              | <i>HOOK2</i>                        |
| 7           | 182703       | cg09533869       | 0.12189                      | 0.54351                | 0.42162               | <i>PGCP</i>                         |
| 8           | 485542       | rs2468330        | 0.40563                      | 0.80799                | 0.40235               |                                     |
| 9           | 485561       | rs6546473        | 0.40975                      | 0.8096                 | 0.39985               |                                     |
| 10          | 485566       | rs739259         | 0.22973                      | 0.62793                | 0.3982                |                                     |
| 11          | 389458       | cg21927991       | 0.85012                      | 0.457                  | -0.39312              | <i>ZFAT</i>                         |
| 12          | 261966       | cg14123034       | 0.57669                      | 0.18501                | -0.39169              | <i>L3MBTL4</i>                      |
| 13          | 485538       | rs213028         | 0.33747                      | 0.72259                | 0.38512               |                                     |
| 14          | 116088       | cg05890457       | 0.45391                      | 0.83665                | 0.38274               | <i>ARHGEF10</i>                     |
| 15          | 246480       | cg13379757       | 0.78811                      | 0.40578                | -0.38234              |                                     |
| 16          | 485516       | rs10457834       | 0.72943                      | 0.35151                | -0.37792              |                                     |
| 17          | 447746       | cg25599641       | 0.92394                      | 0.55674                | -0.3672               | <i>NAGA</i>                         |
| 18          | 311144       | cg16954525       | 0.32197                      | 0.68911                | 0.36713               | <i>MS4A4A</i>                       |
| 19          | 145092       | cg07437919       | 0.52561                      | 0.15922                | -0.36639              | <i>SLC45A4</i>                      |
| 20          | 59125        | cg02907150       | 0.42158                      | 0.78787                | 0.36629               | <i>PCNX</i>                         |
| 21          | 223881       | cg11956442       | 0.41016                      | 0.77368                | 0.36352               |                                     |
| 22          | 365865       | cg20381372       | 0.33843                      | 0.70088                | 0.36245               | <i>LOC100134317</i>                 |
| 23          | 367053       | cg20459037       | 0.68591                      | 0.32398                | -0.36193              | <i>WDR16</i>                        |
| 24          | 157273       | cg08104845       | 0.70519                      | 0.34573                | -0.35946              | <i>GLUL</i>                         |
| 25          | 161458       | cg08320316       | 0.43367                      | 0.78756                | 0.35389               | <i>RNF216</i>                       |
| 26          | 119400       | cg06064179       | 0.79699                      | 0.44637                | -0.35062              | <i>PLEKHM1P</i>                     |
| 27          | 418678       | cg23804921       | 0.66943                      | 0.31977                | -0.34966              |                                     |
| 28          | 472472       | cg27076160       | 0.74071                      | 0.39342                | -0.34729              | <i>ZNF365</i>                       |
| 29          | 213402       | cg11331837       | 0.42954                      | 0.7728                 | 0.34326               |                                     |
| 30          | 407120       | cg23084506       | 0.54129                      | 0.20045                | -0.34084              | <i>PRAMEF5</i>                      |
| 31          | 220895       | cg11792281       | 0.54053                      | 0.20127                | -0.33926              | <i>NLK</i>                          |
| 32          | 170144       | cg08820231       | 0.30405                      | 0.64127                | 0.33723               | <i>SLC26A10</i>                     |
| 33          | 7278         | cg00345083       | 0.30289                      | 0.63962                | 0.33674               | <i>AJAPI</i>                        |
| 34          | 394844       | cg22304519       | 0.73788                      | 0.40221                | -0.33567              |                                     |
| 35          | 485531       | rs1510189        | 0.3942                       | 0.72938                | 0.33518               |                                     |
| 36          | 420129       | cg23899408       | 0.47816                      | 0.14788                | -0.33028              | <i>HOOK2</i>                        |
| 37          | 294557       | cg15991478       | 0.81759                      | 0.48735                | -0.33024              | <i>UBD</i>                          |
| 38          | 357637       | cg19848924       | 0.8485                       | 0.51997                | -0.32854              |                                     |
| 39          | 96767        | cg04850148       | 0.37416                      | 0.70098                | 0.32682               | <i>CCL4L2; CCL4L1</i>               |

|    |        |            |         |         |          |                                 |
|----|--------|------------|---------|---------|----------|---------------------------------|
| 40 | 146302 | cg07501029 | 0.39536 | 0.72178 | 0.32643  | <i>KIF26B</i>                   |
| 41 | 251419 | cg13612055 | 0.49681 | 0.8211  | 0.3243   | <i>RNU5E; RNU5D;<br/>ACOT12</i> |
| 42 | 140933 | cg07205452 | 0.90026 | 0.57751 | -0.32274 | <i>PRDM10</i>                   |
| 43 | 374956 | cg20979384 | 0.28228 | 0.60258 | 0.3203   |                                 |
| 44 | 143037 | cg07319199 | 0.83807 | 0.51884 | -0.31923 | <i>ANTXR1</i>                   |
| 45 | 200687 | cg10568066 | 0.3007  | 0.61986 | 0.31917  | <i>RNF39</i>                    |
| 46 | 190626 | cg10000195 | 0.83652 | 0.51888 | -0.31764 |                                 |
| 47 | 207438 | cg10975354 | 0.1159  | 0.43351 | 0.31761  | <i>VPS13A; LOC100286938</i>     |
| 48 | 478174 | cg27415324 | 0.72948 | 0.41529 | -0.31419 |                                 |
| 49 | 36864  | cg01800061 | 0.91661 | 0.60309 | -0.31352 | <i>MIR519B; MIR526B</i>         |
| 50 | 125277 | cg06409538 | 0.54335 | 0.23001 | -0.31334 |                                 |
| 51 | 328253 | cg18030105 | 0.6985  | 0.38556 | -0.31294 | <i>ZNF195</i>                   |
| 52 | 468599 | cg26856631 | 0.50776 | 0.19611 | -0.31164 | <i>LSM5</i>                     |
| 53 | 485565 | rs715359   | 0.66521 | 0.35434 | -0.31088 |                                 |
| 54 | 189001 | cg09900440 | 0.75651 | 0.44819 | -0.30832 | <i>HLA-DPA1</i>                 |
| 55 | 323047 | cg17707870 | 0.12268 | 0.43009 | 0.3074   | <i>LHFP</i>                     |
| 56 | 303705 | cg16523115 | 0.59026 | 0.89605 | 0.30578  | <i>IL20RB</i>                   |
| 57 | 116629 | cg05918715 | 0.77954 | 0.47426 | -0.30528 | <i>SHISA2</i>                   |
| 58 | 218975 | cg11680857 | 0.69479 | 0.38959 | -0.3052  | <i>LCE2D</i>                    |
| 59 | 275290 | cg14795227 | 0.66052 | 0.35658 | -0.30394 |                                 |
| 60 | 27242  | cg01303420 | 0.73203 | 0.42815 | -0.30389 | <i>C3orf55</i>                  |
| 61 | 485575 | rs951295   | 0.36173 | 0.66553 | 0.30379  |                                 |
| 62 | 302713 | cg16464924 | 0.56818 | 0.87158 | 0.30339  | <i>GAA</i>                      |
| 63 | 461459 | cg26445985 | 0.34149 | 0.64327 | 0.30177  | <i>DENND2A</i>                  |
| 64 | 166866 | cg08629394 | 0.41257 | 0.71276 | 0.30018  |                                 |

---

**Table S6.** Differentially methylated probes between unaffected offspring and bipolar disorder patients

| <b>Rank</b> | <b>Index</b> | <b>Target ID</b> | <b>Offspring AVG Beta</b> | <b>BD AVG Beta</b> | <b>Delta Beta</b> | <b>Illumina Gene Annotation</b> |
|-------------|--------------|------------------|---------------------------|--------------------|-------------------|---------------------------------|
| 1           | 261966       | cg14123034       | 0.69639                   | 0.18379            | -0.5126           | <i>L3MBTL4</i>                  |
| 2           | 232939       | cg12515659       | 0.68621                   | 0.21166            | -0.47455          | <i>FAM134B</i>                  |
| 3           | 485539       | rs2208123        | 0.18016                   | 0.6173             | 0.43714           |                                 |
| 4           | 1113         | cg00045070       | 0.5902                    | 0.16964            | -0.42056          | <i>PCSK9</i>                    |
| 5           | 162978       | cg08412936       | 0.39844                   | 0.81823            | 0.41979           | <i>PSORS1C1</i>                 |
| 6           | 420903       | cg23943944       | 0.29044                   | 0.70992            | 0.41947           |                                 |
| 7           | 145228       | cg07446795       | 0.87965                   | 0.46651            | -0.41313          | <i>CCDC40</i>                   |
| 8           | 140429       | cg07179329       | 0.40153                   | 0.8042             | 0.40267           | <i>CDH13</i>                    |
| 9           | 116300       | cg05900567       | 0.59664                   | 0.19687            | -0.39976          |                                 |
| 10          | 485538       | rs213028         | 0.3321                    | 0.72101            | 0.38891           |                                 |
| 11          | 460690       | cg26398228       | 0.34913                   | 0.72761            | 0.37848           |                                 |
| 12          | 407120       | cg23084506       | 0.56815                   | 0.19767            | -0.37048          | <i>PRAMEF5</i>                  |
| 13          | 119400       | cg06064179       | 0.79083                   | 0.42867            | -0.36217          | <i>PLEKHM1P</i>                 |
| 14          | 485537       | rs2125573        | 0.73229                   | 0.37576            | -0.35653          |                                 |
| 15          | 6860         | cg00325917       | 0.48153                   | 0.8371             | 0.35558           | <i>SELL</i>                     |
| 16          | 164958       | cg08522473       | 0.92101                   | 0.57185            | -0.34915          | <i>TAGLN3</i>                   |
| 17          | 179474       | cg09351263       | 0.54725                   | 0.19839            | -0.34886          |                                 |
| 18          | 419138       | cg23836570       | 0.5326                    | 0.87885            | 0.34625           | <i>FBRSL1</i>                   |
| 19          | 213127       | cg11314779       | 0.8831                    | 0.53801            | -0.34509          |                                 |
| 20          | 485518       | rs10796216       | 0.55979                   | 0.21687            | -0.34292          |                                 |
| 21          | 396292       | cg22402398       | 0.74372                   | 0.4018             | -0.34192          | <i>FGR</i>                      |
| 22          | 350115       | cg19405842       | 0.88288                   | 0.54172            | -0.34116          | <i>PRKCZ</i>                    |
| 23          | 223881       | cg11956442       | 0.42945                   | 0.76728            | 0.33783           |                                 |
| 24          | 463816       | cg26576978       | 0.45006                   | 0.78547            | 0.33541           |                                 |
| 25          | 116108       | cg05891136       | 0.58946                   | 0.92431            | 0.33486           | <i>MYOM2</i>                    |
| 26          | 476971       | cg27341708       | 0.24295                   | 0.57466            | 0.33171           | <i>MAML3</i>                    |
| 27          | 202953       | cg10701801       | 0.06483                   | 0.39634            | 0.33151           | <i>OSBPL9</i>                   |
| 28          | 189001       | cg09900440       | 0.77725                   | 0.44612            | -0.33113          | <i>HLA-DPA1</i>                 |
| 29          | 178385       | cg09289202       | 0.69895                   | 0.37018            | -0.32877          | <i>STK25</i>                    |
| 30          | 153179       | cg07876831       | 0.76254                   | 0.43471            | -0.32783          | <i>TMCO3</i>                    |
| 31          | 301482       | cg16398051       | 0.46819                   | 0.79593            | 0.32774           | <i>ADAMTS17</i>                 |
| 32          | 66803        | cg03299990       | 0.32387                   | 0.6491             | 0.32523           |                                 |
| 33          | 235770       | cg12687426       | 0.59724                   | 0.92012            | 0.32288           | <i>KCNMB3</i>                   |
| 34          | 74862        | cg03706056       | 0.5352                    | 0.21428            | -0.32092          | <i>SETD4</i>                    |
| 35          | 348332       | cg19285525       | 0.36288                   | 0.68247            | 0.3196            | <i>RBMS1</i>                    |
| 36          | 151367       | cg07777042       | 0.52756                   | 0.84707            | 0.3195            |                                 |
| 37          | 687          | cg00028022       | 0.5443                    | 0.22536            | -0.31894          |                                 |
| 38          | 375699       | cg21028319       | 0.67159                   | 0.35529            | -0.3163           | <i>TM2D2</i>                    |

|    |        |            |         |         |          |                                   |
|----|--------|------------|---------|---------|----------|-----------------------------------|
| 39 | 311264 | cg16963093 | 0.69048 | 0.37654 | -0.31394 | <i>ATXN7L1</i>                    |
| 40 | 297138 | cg16147201 | 0.33515 | 0.64603 | 0.31089  |                                   |
| 41 | 21693  | cg01029331 | 0.61995 | 0.9284  | 0.30845  | <i>SDHAP1</i>                     |
| 42 | 485516 | rs10457834 | 0.65718 | 0.34991 | -0.30728 |                                   |
| 43 | 439894 | cg25099095 | 0.1846  | 0.49178 | 0.30718  |                                   |
| 44 | 185098 | cg09672255 | 0.53597 | 0.84182 | 0.30585  | <i>ZNF879</i>                     |
| 45 | 485572 | rs9292570  | 0.86523 | 0.56142 | -0.30382 |                                   |
| 46 | 36864  | cg01800061 | 0.89669 | 0.59348 | -0.30321 | <i>MIR519B;</i><br><i>MIR526B</i> |
| 47 | 395319 | cg22337626 | 0.66367 | 0.361   | -0.30266 | <i>MAST2</i>                      |

---

**Table S7.** Top networks enriched in the list of risk genes for BD

| <b>ID</b> | <b>Molecules in Network</b>                                                                                                                                                                                                                                                                                                                                                                                                    | <b>Score</b> | <b>Focus Molecules</b> | <b>Top Diseases and Functions</b>                                                      |
|-----------|--------------------------------------------------------------------------------------------------------------------------------------------------------------------------------------------------------------------------------------------------------------------------------------------------------------------------------------------------------------------------------------------------------------------------------|--------------|------------------------|----------------------------------------------------------------------------------------|
| 1         | 2010109I03Rik, ADRB2, <b>ALDH6A1</b> , APP, <b>ARID4B</b> , <b>ATP6V1F</b> , beta-estradiol, C14orf93, CASP3, <b>CLASRP</b> , <b>CLPTM1</b> , <b>COG5</b> , FOS, <b>GLUL</b> , GPR61, GPR78, GPR85, GPR88, GPR139, GPR173, <b>HINT3</b> , <b>HOOK2</b> , IGSF6, <b>LSM14B</b> , <b>MAGI2</b> , MOV10, NTRK1, <b>NUCKS1</b> , <b>PBX2</b> , <b>PCNX</b> , <b>PEX2</b> , PIK3R2, <b>PRR14</b> , PTTG2, ZNF343                    | 37           | 16                     | Cancer, Organismal Injury and Abnormalities, Reproductive System Disease               |
| 2         | Androgen-AR, CACHD1, CD3, CDC42, CDC42SE1, CDC42SE2, CYP1A1, DNAJB14, <b>DNAJC7</b> , DNAJC8, EML4, <b>FBXW11</b> , <b>GTF2A1</b> , <b>HSPA1L</b> , <b>HUWE1</b> , <b>IL7R</b> , indonol, INF2, LPIN2, MAP2K4/7, <b>MED1</b> , <b>MTF2</b> , NFkB (complex), POLR2F, POLR2K, RNA pol2-transcription factor, <b>SAFB2</b> , <b>SNORA65</b> , SUMO4, <b>SUZ12</b> , <b>TAF15</b> , <b>THOC2</b> , TRIM52, ZKSCAN1, <b>ZNF234</b> | 32           | 14                     | Cellular Development, Hematological System Development and Function, Hematopoiesis     |
| 3         | Anti-inflammatory Cytokine, <b>ATP8B2</b> , ATP9A, CHST3, <b>CPQ</b> , <b>FASTK</b> , GATM, GCC2, GNA14, IL4, ISG15, ITGBL1, ITPA, KITLG, <b>LCE2C/LCE2D</b> , LOXL1, LRRC32, METRNL, MNK1/2, MPHOSPH9, MYB, <b>NLK</b> , <b>PITPNM1</b> , RNF152, PNF220, SCGB3A1, SPRY1, TFAP2A, TGFB1, Tnfrsf22/Tnfrsr23, <b>UBE2E1</b> , VTCN1, Zfp35, <b>ZNF195</b> , <b>ZNF641</b>                                                       | 19           | 9                      | Hematological System Development and Function, Tissue Morphology, Cellular Development |
| 4         | LHX1, <b>SLC45A4</b>                                                                                                                                                                                                                                                                                                                                                                                                           | 3            | 1                      | Cell Death and Survival, Cellular Movement, Nervous System Development and Function    |

**Table S8.** List of genes showing a very strong correlation between expression and methylation ( $r^2 > |0.8|$ ).

| Rank | Gene            | Pearson's R | Rank | Gene          | Pearson's R |
|------|-----------------|-------------|------|---------------|-------------|
| 1    | <i>HLA-DRB5</i> | 0.9832      | 34   | <i>MALTI</i>  | 0.84992     |
| 2    | <i>HLA-DRB5</i> | 0.97487     | 35   | <i>SFRS18</i> | 0.84987     |
| 3    | <i>HLA-DRB5</i> | 0.95908     | 36   | <i>ANUBL1</i> | -0.84985    |
| 4    | <i>RAB34</i>    | -0.94641    | 37   | <i>PTPRN2</i> | -0.84947    |
| 5    | <i>RAB34</i>    | -0.94073    | 38   | <i>PTPRN2</i> | -0.84947    |
| 6    | <i>RAB34</i>    | -0.94067    | 39   | <i>PSMB8</i>  | 0.84916     |
| 7    | <i>HLA-DRB5</i> | 0.93113     | 40   | <i>ADARB2</i> | -0.84903    |
| 8    | <i>PBX2</i>     | -0.92892    | 41   | <i>GABRG2</i> | -0.84892    |
| 9    | <i>KIFC1</i>    | -0.92295    | 42   | <i>TFDPI</i>  | -0.84777    |
| 10   | <i>ZNF384</i>   | 0.9093      | 43   | <i>PRX</i>    | 0.84697     |
| 11   | <i>RAB34</i>    | -0.9045     | 44   | <i>FAM13A</i> | -0.84664    |
| 12   | <i>RIMBP2</i>   | -0.89906    | 45   | <i>HSPA1L</i> | 0.84606     |
| 13   | <i>NUCKS1</i>   | 0.89758     | 46   | <i>QKI</i>    | -0.84454    |
| 14   | <i>HLA-DRB5</i> | 0.89693     | 47   | <i>E2F4</i>   | 0.8439      |
| 15   | <i>RAB34</i>    | -0.89405    | 48   | <i>ASF1B</i>  | 0.84344     |
| 16   | <i>RAB34</i>    | -0.89279    | 49   | <i>MBNL3</i>  | 0.84257     |
| 17   | <i>UBAC2</i>    | -0.87961    | 50   | <i>ADPGK</i>  | -0.8411     |
| 18   | <i>TADA3</i>    | 0.87778     | 51   | <i>KDM2B</i>  | 0.84085     |
| 19   | <i>RAB34</i>    | -0.87489    | 52   | <i>TAF1C</i>  | 0.84057     |
| 20   | <i>SUPT6H</i>   | -0.87316    | 53   | <i>PTPRN2</i> | -0.83875    |
| 21   | <i>PBX2</i>     | -0.86884    | 54   | <i>ZNF692</i> | 0.83808     |
| 22   | <i>CENPT</i>    | 0.86767     | 55   | <i>BZW2</i>   | 0.83703     |
| 23   | <i>HLA-DRB5</i> | 0.86722     | 56   | <i>BCL2</i>   | -0.83665    |
| 24   | <i>PGAM4</i>    | 0.86576     | 57   | <i>SFRS18</i> | 0.83653     |
| 25   | <i>HSPA1L</i>   | 0.86424     | 58   | <i>SEPT9</i>  | -0.83409    |
| 26   | <i>PBX2</i>     | -0.86097    | 59   | <i>LSM14B</i> | -0.83365    |
| 27   | <i>RAB43</i>    | -0.86053    | 60   | <i>NUCKS1</i> | -0.83333    |
| 28   | <i>NUCKS1</i>   | 0.86032     | 61   | <i>METRNL</i> | 0.83154     |
| 29   | <i>MAP7</i>     | -0.857      | 62   | <i>USP5</i>   | 0.83114     |
| 30   | <i>MTF2</i>     | 0.85641     | 63   | <i>EIF1AY</i> | -0.83085    |
| 31   | <i>HLA-DRB5</i> | 0.85522     | 64   | <i>CD44</i>   | -0.83077    |
| 32   | <i>FASTK</i>    | 0.85387     | 65   | <i>MAML3</i>  | 0.83076     |
| 33   | <i>EIF1AY</i>   | -0.85039    | 66   | <i>MRAS</i>   | -0.82975    |

| Rank | Gene            | Pearson's R |
|------|-----------------|-------------|
| 67   | <i>TIAF1</i>    | -0.82758    |
| 68   | <i>DDX46</i>    | 0.82721     |
| 69   | <i>LDHB</i>     | 0.82517     |
| 70   | <i>HLA-DRB5</i> | -0.82501    |
| 71   | <i>KIAA1737</i> | -0.82487    |
| 72   | <i>MYOM1</i>    | 0.82189     |
| 73   | <i>ZNF384</i>   | 0.82185     |
| 74   | <i>SAE1</i>     | 0.8196      |
| 75   | <i>PTPRN2</i>   | -0.81954    |
| 76   | <i>CPSF1</i>    | 0.81819     |
| 77   | <i>NUCKS1</i>   | 0.818       |
| 78   | <i>ENC1</i>     | 0.81718     |
| 79   | <i>SLC22A17</i> | 0.81707     |
| 80   | <i>CCR4</i>     | 0.81637     |
| 81   | <i>PRDM16</i>   | -0.81578    |
| 82   | <i>DCUN1D4</i>  | -0.81524    |
| 83   | <i>MCM6</i>     | 0.81513     |
| 84   | <i>ITPKB</i>    | -0.81471    |
| 85   | <i>SMAD3</i>    | -0.81456    |
| 86   | <i>PTTG1</i>    | -0.81433    |
| 87   | <i>CSMD1</i>    | -0.81405    |
| 88   | <i>PGAM4</i>    | 0.8137      |
| 89   | <i>KIF17</i>    | -0.81316    |
| 90   | <i>RPS6KA3</i>  | -0.81309    |
| 91   | <i>PUM1</i>     | 0.81179     |
| 92   | <i>TIGD1</i>    | 0.81148     |
| 93   | <i>ZNF92</i>    | -0.81147    |
| 94   | <i>SEPT9</i>    | 0.81115     |
| 95   | <i>RAB11B</i>   | -0.81079    |
| 96   | <i>CD248</i>    | -0.8105     |
| 97   | <i>PBX2</i>     | -0.80972    |
| 98   | <i>EDN3</i>     | -0.80961    |
| 99   | <i>ERMN</i>     | -0.80952    |
| 100  | <i>EN1</i>      | 0.80884     |

| Rank | Gene                     | Pearson's R |
|------|--------------------------|-------------|
| 101  | <i>KIAA1530</i>          | 0.80869     |
| 102  | <i>PCNA</i>              | -0.80854    |
| 103  | <i>HOXC4;HOXC6;HOXC5</i> | 0.80815     |
| 104  | <i>C19orf6</i>           | 0.80808     |
| 105  | <i>CTDP1</i>             | -0.80797    |
| 106  | <i>MAP7</i>              | -0.80708    |
| 107  | <i>RNF212</i>            | -0.80683    |
| 108  | <i>UGP2</i>              | 0.80669     |
| 109  | <i>BAT2</i>              | 0.80626     |
| 110  | <i>FTH1</i>              | -0.80615    |
| 111  | <i>NSUN5</i>             | -0.80603    |
| 112  | <i>ACTN1</i>             | -0.80561    |
| 113  | <i>RWDD1</i>             | 0.80555     |
| 114  | <i>ATP5D</i>             | 0.80539     |
| 115  | <i>MAP4K4</i>            | 0.80475     |
| 116  | <i>MGST1</i>             | -0.80432    |
| 117  | <i>NUCKS1</i>            | 0.8043      |
| 118  | <i>ADPRHL1</i>           | -0.80421    |
| 119  | <i>ATP11A</i>            | -0.80337    |
| 120  | <i>IQCK</i>              | 0.80307     |
| 121  | <i>SEC14L1</i>           | -0.80244    |
| 122  | <i>KIAA1407</i>          | 0.80221     |
| 123  | <i>FAM98A</i>            | -0.80198    |
| 124  | <i>HNRNPUL2;TTC9C</i>    | 0.8019      |
| 125  | <i>SCRIB</i>             | -0.80156    |
| 126  | <i>SLC29A1</i>           | -0.80153    |
| 127  | <i>GSTP2</i>             | -0.80141    |
| 128  | <i>HNRNPA0</i>           | -0.80124    |
| 129  | <i>FBXL19</i>            | -0.80119    |
| 130  | <i>PHF5A;ACO2</i>        | 0.801       |
| 131  | <i>CENPT</i>             | 0.80095     |
| 132  | <i>HSPB1</i>             | -0.80068    |
| 133  | <i>C14orf119;ACINI</i>   | 0.80065     |
| 134  | <i>USF2</i>              | 0.80037     |
| 135  | <i>TAF15</i>             | 0.80004     |



## References

1. Andersen CL, Jensen JL, Orntoft TF. Normalization of real-time quantitative reverse transcription-PCR data: a model-based variance estimation approach to identify genes suited for normalization, applied to bladder and colon cancer data sets. *Cancer Res* 2004; **64**:5245-50.
2. Livak KJ, Schmittgen TD. Analysis of relative gene expression data using real-time quantitative PCR and the 2(-Delta Delta C(T)) Method. *Methods* 2001; **25**:402-8.
3. Tryka KA, Hao L, Sturcke A, Jin Y, Wang ZY, Ziyabari L, et al. NCBI's Database of Genotypes and Phenotypes: dbGaP. *Nucleic Acids Res* 2014; **42**:D975-9.
4. Cichon S, Schumacher J, Muller DJ, Hurter M, Windemuth C, Strauch K, et al. A genome screen for genes predisposing to bipolar affective disorder detects a new susceptibility locus on 8q. *Hum Mol Genet* 2001; **10**:2933-44.
5. Gonzalez S, Camarillo C, Rodriguez M, Ramirez M, Zavala J, Armas R, et al. A genome-wide linkage scan of bipolar disorder in Latino families identifies susceptibility loci at 8q24 and 14q32. *Am J Med Genet B Neuropsychiatr Genet* 2014; **165b**:479-91.
6. Lekman M, Karlsson R, Graae L, Hossjer O, Kockum I. A significant risk locus on 19q13 for bipolar disorder identified using a combined genome-wide linkage and copy number variation analysis. *BioData Min* 2015; **8**:42.
7. Francks C, Tozzi F, Farmer A, Vincent JB, Rujescu D, St Clair D, et al. Population-based linkage analysis of schizophrenia and bipolar case-control cohorts identifies a potential susceptibility locus on 19q13. *Mol Psychiatry* 2010; **15**:319-25.
8. Georgi B, Craig D, Kember RL, Liu W, Lindquist I, Nasser S, et al. Genomic view of bipolar disorder revealed by whole genome sequencing in a genetic isolate. *PLoS Genet* 2014; **10**:e1004229.
9. Badner JA, Gershon ES. Meta-analysis of whole-genome linkage scans of bipolar disorder and schizophrenia. *Mol Psychiatry* 2002; **7**:405-11.

10. Large-scale genome-wide association analysis of bipolar disorder identifies a new susceptibility locus near ODZ4. *Nat Genet* 2011; **43**:977-83.
11. Clelland CL, Read LL, Panek LJ, Nadrich RH, Bancroft C, Clelland JD. Utilization of never-medicated bipolar disorder patients towards development and validation of a peripheral biomarker profile. *PLoS One* 2013; **8**:e69082.
12. Savitz J, Frank MB, Victor T, Bebak M, Marino JH, Bellgowan PS, et al. Inflammation and neurological disease-related genes are differentially expressed in depressed patients with mood disorders and correlate with morphometric and functional imaging abnormalities. *Brain Behav Immun* 2013; **31**:161-71.
